1           **Interplay between intrinsic reprogramming potential and microenvironment controls**  
2                                   **neuroblastoma cell plasticity and identity**

3  
4 **Authors:** Cécile Thirant<sup>1,2§</sup>, Agathe Peltier<sup>1,2§</sup>, Simon Durand<sup>1,2#</sup>, Amira Kramdi<sup>1,2#</sup>, Caroline Louis-  
5 Brennetot<sup>1,2#</sup>, Cécile Pierre-Eugène<sup>1,2#</sup>, Ana Costa<sup>1,2</sup>, Amandine Grelier<sup>1,2</sup>, Sakina Zaïdi<sup>1,2</sup>, Nadège  
6 Gruel<sup>1,4</sup>, Irène Jimenez<sup>2,3,4</sup>, Eve Lapouble<sup>5</sup>, Gaëlle Pierron<sup>5</sup>, Hervé J. Brisse<sup>6</sup>, Arnaud Gauthier<sup>7</sup>, Paul  
7 Fréneaux<sup>7</sup>, Sandrine Grossetête-Lalami<sup>1,2</sup>, Laura G. Baudrin<sup>8</sup>, Virginie Raynal<sup>1,8</sup>, Sylvain Baulande<sup>8</sup>,  
8 Angela Bellini<sup>2,3,4</sup>, Jaydutt Bhalshankar<sup>2,3,4</sup>, Angel M. Carcaboso<sup>9</sup>, Birgit Geoerger<sup>10</sup>, Hermann  
9 Rohrer<sup>11</sup>, Didier Surdez<sup>1,2</sup>, Valentina Boeva<sup>12,13,14</sup>, Gudrun Schleiermacher<sup>2,3,4</sup>, Olivier Delattre<sup>1,2</sup>,  
10 Isabelle Janoueix-Lerosey<sup>1,2\*</sup>

11  
12 **Affiliations :**

13 <sup>1</sup>Institut Curie, PSL Research University, Inserm U830, Equipe Labellisée Ligue contre le Cancer, Paris, France.

14 <sup>2</sup>SIREDO: Care, Innovation and Research for Children, Adolescents and Young Adults with Cancer, Institut Curie,  
15 Paris, France.

16 <sup>3</sup>Institut Curie, Laboratory Recherche Translationnelle en Oncologie Pédiatrique (RTOP), Laboratoire “Gilles  
17 Thomas”, Paris, France.

18 <sup>4</sup>Institut Curie Department of Translational Research, Paris, France.

19 <sup>5</sup>Institut Curie, Unité de Génétique Somatique, Paris, France.

20 <sup>6</sup>Institut Curie, Department of Imaging, PSL Research University, Paris, France.

21 <sup>7</sup>Institut Curie, Department of Biopathology, Paris, France.

22 <sup>8</sup>Institut Curie, Genomics of Excellence (ICGex) Platform, Paris, France.

23 <sup>9</sup>Institut de Recerca Sant Joan de Déu, Barcelona, Spain.

24 <sup>10</sup>Gustave Roussy Cancer Campus, INSERM U1015, Department of Pediatric and Adolescent Oncology, Univ.  
25 Paris-Sud, Université Paris-Saclay, Villejuif, France.

26 <sup>11</sup>Institute of Clinical Neuroanatomy, Dr. Senckenberg Anatomy, Neuroscience Center,  
27 Goethe University, Frankfurt/M, Germany

28 <sup>12</sup>Inserm, U1016, Cochin Institute, CNRS UMR8104, Paris Descartes University, Paris, France.

29 <sup>13</sup>ETH Zürich, Department of Computer Science, Institute for Machine Learning, Zürich, Switzerland.

30 <sup>14</sup>Swiss Institute of Bioinformatics (SIB), Zürich, Switzerland.

31  
32 <sup>§,#</sup>These authors contributed equally to this work.

33 \* Corresponding author and lead contact: janoueix@curie.fr

34

35

36 **Abstract**

37

38 **Two cell identities, noradrenergic and mesenchymal, have been characterized in neuroblastoma cell**  
39 **lines according to their epigenetic landscapes relying on specific circuitries of transcription factors.**  
40 **Yet, their relationship and relative contribution in patient tumors remain poorly defined. Here, we**  
41 **demonstrate that the knock-out of *GATA3*, but not of *PHOX2A* or *PHOX2B*, in noradrenergic cells**  
42 **induces a mesenchymal phenotype. Our results document spontaneous plasticity in several models**  
43 **between both identities and show that plasticity relies on epigenetic reprogramming. We**  
44 **demonstrate that an *in vivo* microenvironment provides a powerful pressure towards a**  
45 **noradrenergic identity for these models. Consistently, tumor cells with a mesenchymal identity are**  
46 **not detected in a series of PDX models. Further study of the intra-tumor noradrenergic**  
47 **heterogeneity reveals two distinct cell populations exhibiting features of chromaffin-like or**  
48 **sympathoblast-like cells. This work emphasizes that both external cues of the environment and**  
49 **intrinsic factors control plasticity and cell identity in neuroblastoma.**

50

51 **INTRODUCTION**

52 Neuroblastoma is a childhood cancer arising from the peripheral sympathetic nervous system,  
53 known to be derived from multipotent neural crest cells (NCCs). Tumors mostly develop in the adrenal  
54 gland but a subset of them originates from sympathetic ganglia along the paravertebral sympathetic  
55 chain<sup>1</sup>. With respect to these localizations, neuroblastoma likely arises from the transformation of  
56 sympathoblasts either in sympathetic ganglia or in the adrenal medulla, or from catecholamine-  
57 secreting chromaffin cells of the adrenal medulla, or alternatively from a common sympatho-adrenal  
58 progenitor<sup>2,3</sup>.

59 The hallmark of neuroblastoma is its wide range of clinical presentations and outcomes,  
60 ranging from spontaneous regression to fatal outcome despite multimodal therapies<sup>1</sup>. High-risk  
61 neuroblastoma most often initially responds to intensive chemotherapy; however, relapses frequently  
62 occur followed by fatal outcome. Several genes including *MYCN*<sup>4</sup>, *ALK*<sup>5-8</sup> and *TERT*<sup>9-11</sup> have been  
63 identified as key drivers of neuroblastoma oncogenesis.

64 The master transcriptional regulators controlling the gene expression program of  
65 neuroblastoma have been recently highlighted through the characterization of the neuroblastoma  
66 super-enhancer landscape of neuroblastoma cell lines, revealing two distinct cell identities: a  
67 sympathetic noradrenergic identity defined by a core regulatory circuitry (CRC) module including the

68 PHOX2B, HAND2 and GATA3 transcription factors (TFs) and a NCC-like/mesenchymal identity, close to  
69 that of human neural crest cells (NCCs), driven by TFs of the AP1 family among others<sup>12,13</sup>. Additional  
70 TFs participating in the noradrenergic CRC have been then identified, including ISL1, TBX2 and ASCL1<sup>14-</sup>  
71 <sup>16</sup>. It is likely that PHOX2A, also highly expressed in neuroblastoma cell lines and exhibiting the same  
72 DNA binding domain as PHOX2B is involved in the noradrenergic CRC. Importantly, mesenchymal  
73 tumor cells *in vitro* have been shown to be more resistant to standard chemotherapy<sup>12,13</sup> suggesting  
74 that they may be involved in therapeutic resistance and relapses in neuroblastoma patients. Bulk RNA-  
75 seq analyses or immunohistochemistry with few markers suggested that mesenchymal tumor cells are  
76 present in patient tumors and that some tumors exhibit a mesenchymal identity<sup>12,13,17</sup>. Cellular  
77 plasticity between the noradrenergic and mesenchymal states has been reported for a few cell  
78 lines<sup>13,18</sup>, still the underlying mechanisms wherein the cell phenotype switches from one to the other  
79 state (considered as transdifferentiation) remain poorly described. In the present paper, we have  
80 combined various approaches including genetic inactivation of specific TFs and single-cell  
81 transcriptomic analyses to unravel TFs involved in cell identity and plasticity and better decipher the  
82 relationship and relative contribution of cells of noradrenergic and mesenchymal identity in  
83 neuroblastoma tumors.

84

## 85 RESULTS

### 86 The knock-out of *GATA3* but not of *PHOX2B* or *PHOX2A* induces a switch from a 87 noradrenergic to a mesenchymal identity

88 In order to directly address the functional role of the PHOX2A, PHOX2B and GATA3 TFs in  
89 shaping the noradrenergic identity, we performed their individual genetic knock-out (KO) in the  
90 noradrenergic SH-SY5Y cell line using a CRISPR-Cas9 approach. Guide RNAs were designed to induce  
91 large deletions and create frameshift mutations in those genes, leading to truncated and nonfunctional  
92 proteins. We obtained two *PHOX2A*<sup>-/-</sup> clones, a *PHOX2B*<sup>-/-</sup> clone and two *GATA3*<sup>-/-</sup> clones (**Figure S1A**).  
93 While the *PHOX2A*<sup>-/-</sup> and *PHOX2B*<sup>-/-</sup> clones showed a morphology close to that of the parental  
94 noradrenergic SH-SY5Y cells with neurite-like processes, *GATA3*<sup>-/-</sup> cells exhibited a more abundant  
95 cytoplasm and many actin stress fibers consistent with a mesenchymal phenotype (**Figure 1A**).  
96 *PHOX2A*<sup>-/-</sup> and *PHOX2B*<sup>-/-</sup> clones maintained the expression of the noradrenergic CRC TFs including  
97 GATA3 and HAND2 (**Figures 1B and S1B**). Strikingly, both *GATA3*<sup>-/-</sup> clones showed an absence or highly  
98 reduced expression of the TFs from the noradrenergic CRC, including PHOX2A, PHOX2B, and HAND2  
99 (**Figure 1B**). *PHOX2B*<sup>-/-</sup> and *GATA3*<sup>-/-</sup> cells were characterized by a decreased proliferation compared to  
100 the parental SH-SY5Y cell line (**Figure 1C**). Consistently with their phenotype, *GATA3*<sup>-/-</sup> clones displayed

101 mesenchymal properties such as an increased invasion ability measured in a 3D-spheroid assay (**Figure**  
102 **1D**), increased migration capacity documented using a transwell assay (**Figure 1E**) and a higher  
103 resistance to chemotherapy *in vitro* (**Figure 1F**). Bulk RNA-seq analysis showed that *PHOX2A*<sup>-/-</sup> and  
104 *PHOX2B*<sup>-/-</sup> clones harbored transcriptomic profiles highly similar to that of the parental noradrenergic  
105 SH-SY5Y cell line, confirming that *PHOX2A* or *PHOX2B* genetic invalidation did not change the cell  
106 identity. In contrast, *GATA3*<sup>-/-</sup> clones, at two different passages called early and late showed a  
107 mesenchymal transcriptomic profile, as they clustered with the mesenchymal SH-EP cell line (**Figures**  
108 **1G and S1C**). Accordingly, Gene Ontology analysis on the 2,938 differentially expressed genes between  
109 the transcriptomic profiles of the 4 *GATA3*<sup>-/-</sup> samples versus 5 noradrenergic neuroblastoma cell lines  
110 (without *MYCN* amplification as the parental SH-SY5Y) retrieved categories related to neuron  
111 differentiation, neurogenesis, sympathetic nervous development for the downregulated genes and  
112 extracellular matrix organization, cell motility and cell migration for the upregulated genes (**Figure**  
113 **S1D**).

114           These observations therefore demonstrated that the KO of the *PHOX2A*, *PHOX2B* or *GATA3*  
115 transcription factors has different consequences on the maintenance of the noradrenergic identity and  
116 that SH-SY5Y cells are able to transdifferentiate from a noradrenergic to a mesenchymal state upon  
117 *GATA3* KO.

118

### 119           **Spontaneous plasticity between the noradrenergic and mesenchymal states reveals the** 120 **reprogramming potential of a subset of neuroblastoma cells**

121           Our previous study has shown that most of the neuroblastoma cell lines (18 out of 25) exhibit  
122 a noradrenergic identity whereas only 3 have a mesenchymal epigenetic profile. An intermediate  
123 group of cells expressing noradrenergic TFs and mesenchymal TFs was composed of 4 samples,  
124 including the heterogeneous SK-N-SH cell line<sup>12</sup>. Interestingly, plasticity properties have been reported  
125 for this cell line<sup>18</sup>. Using single-cell transcriptomic sequencing with the 10X Genomics technology, we  
126 highlight here two cell populations in the SK-N-SH cell line. Noradrenergic cells expressed *PHOX2B*  
127 whereas *CD44*<sup>19-21</sup> appeared as a specific marker of the mesenchymal population confirmed by FACS  
128 and immunofluorescence (**Figure 2A-C**). An InferCNV analysis that predict the genetic alterations at  
129 the single-cell level<sup>22</sup>, showed that both populations exhibited similar genetic alterations (2p, 7 and  
130 17q gains). Only one subcluster of the mesenchymal population presented with a 1q gain (**Figure 2D**),  
131 consistently with previous data reporting distinct genetic subclones<sup>23</sup>. As *CD44* is a cell surface marker  
132 it was further used to sort both populations. Bulk RNA-seq experiments confirmed that *CD44*<sup>neg</sup> and  
133 *CD44*<sup>pos</sup> sorted cells exhibited transcriptomic profiles close to noradrenergic SH-SY5Y and

134 mesenchymal SH-EP cells, respectively (**Figure 2E**). Both sorted noradrenergic/CD44<sup>neg</sup> and  
135 mesenchymal/CD44<sup>pos</sup> populations were able to give rise to a heterogeneous cell population,  
136 demonstrating a spontaneous and bidirectional plasticity between the noradrenergic and  
137 mesenchymal states (**Figure 2F**). As expected from previous data obtained with the SH-SY5Y and SH-  
138 EP cell lines sub-cloned from the heterogeneous parental SK-N-SH cell line<sup>12</sup>, the  
139 mesenchymal/CD44<sup>pos</sup> population of this cell line exhibited a higher chemo-resistance compared to  
140 the noradrenergic/CD44<sup>neg</sup> one (**Figure 2G**).

141 In order to demonstrate that plasticity between the noradrenergic and mesenchymal states is  
142 not a property exclusively observed in the SK-N-SH sample, we generated new cell lines from a series  
143 of 10 neuroblastoma PDX models. Cells from two models could be maintained in culture for several  
144 months and frozen. One cell line had a pure noradrenergic phenotype. Strikingly, the other cell line  
145 called IC-pPDXC-63 was able to grow *in vitro* as a bi-phenotypic culture, with both adherent cells and  
146 floating neurospheres (**Figure 3A**). Bulk RNA-seq analysis confirmed that the original PDX model (IC-  
147 pPDX-63) and its derived-cell line exhibited a transcriptomic profile highly similar to the one of the  
148 patient tumor (NB1549) (**Figure 3B**). As shown by single-cell analysis, two main clusters of  
149 noradrenergic cells and mesenchymal tumor cells were observed in the IC-pPDXC-63 cell line, with a  
150 bridge of cells in-between (**Figure 3C**). Noradrenergic cells expressed *PHOX2B*, whereas the  
151 mesenchymal population expressed the cell surface CD44 marker (**Figure 3C**). The clustering  
152 separating noradrenergic and mesenchymal tumor cells is not biased by the cell cycle (**Figure 3C**).  
153 Immunofluorescence confirmed that CD44 and PHOX2B were specifically expressed by adherent cells  
154 and neurospheres, respectively (**Figure 3D**). Bulk RNA-seq analysis endorsed that CD44<sup>pos</sup> FACS-sorted  
155 cells and adherent cells have a transcriptomic profile close to the mesenchymal SH-EP cells, whereas  
156 CD44<sup>neg</sup> FACS-sorted cells and floating neurospheres clustered with the noradrenergic SH-SY5Y cells  
157 (**Figure 3B**). Consistently with the observations in the SK-N-SH cell line, we documented that the  
158 mesenchymal population of the IC-pPDXC-63 cell line exhibited a higher chemo-resistance compared  
159 to the noradrenergic one (**Figure 3E**). Of note, inferred genomic alterations were similar in the three  
160 populations of the IC-pPDXC-63 cell line, *i.e.*, the noradrenergic, mesenchymal and bridge cells (**Figure**  
161 **3F**). We next investigated the plasticity properties of both noradrenergic and mesenchymal cells of the  
162 IC-pPDXC-63 cell line *in vitro*. After a few days in culture, both sorted noradrenergic/CD44<sup>neg</sup> and  
163 mesenchymal/CD44<sup>pos</sup> cells were able to reconstitute a heterogeneous cell population (**Figure 3G**), as  
164 previously documented for the SK-N-SH cell line. These observations therefore highlight the  
165 reprogramming potential between the noradrenergic and mesenchymal states of the IC-pPDXC-63  
166 model and importantly, show that this ability does not rely on genetic heterogeneity.

167

168 **Phenotypic plasticity relies on epigenetic reprogramming**

169 To deeper characterize the epigenetic reprogramming contribution to cell plasticity, we next  
170 defined the super-enhancer landscape of our three different models (*GATA3* genetic inactivation, SK-  
171 N-SH and IC-pPDXC-63 cell lines) by CHIP-seq analyses for the H3K27ac mark. We added these samples  
172 in the principal component analysis (PCA) of neuroblastoma cell lines and hNCC lines based on their  
173 super-enhancer log scores<sup>12</sup> (**Figure 4A**). For all three models, their mesenchymal counterparts, *i.e.*  
174 *GATA3*<sup>-/-</sup> clones, SK-N-SH CD44<sup>pos</sup> FACS-sorted and adherent IC-pPDXC-63 cells, showed an epigenetic  
175 profile close to the group II of mesenchymal identity. Consistently, their noradrenergic counterparts,  
176 SH-SY5Y, SK-N-SH CD44<sup>neg</sup> FACS-sorted and floating IC-pPDXC-63 cells were part of the noradrenergic  
177 cell line group I (**Figure 4A**). For the mesenchymal cells of the three models, a decrease of the H3K27ac  
178 signal could be quantified for the super-enhancer regions of the noradrenergic CRC such as *GATA3*,  
179 *PHOX2B* and *HAND1*. On the other hand, an increase of the H3K27ac signal could be observed on some  
180 NCC-like/mesenchymal TFs such as *RUNX1*, *FOSL1*, *NR3C1*, and *TBX18* (**Figure 4B,C**). Of note, the  
181 decreased *PHOX2A* and *HAND2* protein expressions in the *GATA3*<sup>-/-</sup> clones (**Figure 1B**) contrasted with  
182 high transcript levels (**Figure 1G**) and high H3K27ac scores (**Figure 4B**) suggesting a distinct  
183 transcriptional and post-transcriptional regulation for these specific genes.

184 Altogether, these results indicate that the transdifferentiation from a noradrenergic to a  
185 mesenchymal identity obtained after the genetic inactivation of *GATA3* or spontaneously from SK-N-  
186 SH and IC-pPDXC-63 cells is supported by an epigenetic reprogramming.

187

188 **Mesenchymal neuroblastoma cells are reprogrammed to a noradrenergic phenotype *in vivo***

189 Since noradrenergic and mesenchymal cells of our three models presented with different  
190 properties *in vitro*, we next investigated their behavior *in vivo*. We injected the noradrenergic/CD44<sup>neg</sup>  
191 and mesenchymal/CD44<sup>pos</sup> sorted cell populations from the two heterogeneous SK-N-SH and IC-  
192 pPDXC-63 cell lines, as well as the *GATA3*<sup>-/-</sup> cells, into mice. Tumors developed in all cases, indicating  
193 that the different states displayed tumorigenic potential *in vivo*. Unexpectedly, as revealed by IHC  
194 analysis, *PHOX2B* expression was observed in most tumor cells from the whole set of xenografts, even  
195 those obtained after engraftment of mesenchymal populations (**Figure 5A**). Bulk RNA-seq experiments  
196 confirmed that all tumors highly expressed the TFs of the noradrenergic CRC and exhibited a  
197 noradrenergic transcriptomic profile (**Figures 5B and S2**). Xenografts of the *GATA3*<sup>-/-</sup> clones re-  
198 expressed the noradrenergic and neuroendocrine *DBH*, *NET/SLC6A2*, *CHGA* and *CHGB* markers  
199 compared to the clones cultured *in vitro* (**Table S1**). Consistently, *PHOX2B* and *DBH* proteins were  
200 detected in the *GATA3*<sup>-/-</sup> cell xenografts (**Figure 5C**). Additionally, these markers were similarly

201 expressed in xenografts obtained with the two CD44<sup>pos</sup> and CD44<sup>neg</sup> cell populations of the SK-N-SH  
202 and IC-pPDXC-63 cell lines (**Table S1**). Differential analyses (Fold-change >2; Bonferroni-corrected p-  
203 value <0.05) showed that xenografts obtained from CD44<sup>pos</sup> and CD44<sup>neg</sup> cells of both heterogeneous  
204 cell lines were highly similar, with less than 50 genes (data not shown) showing a differential  
205 expression, compared to more than 2,000 genes differentially expressed *in vitro*. Of note, some genes  
206 of the neurogenesis and extracellular matrix organization were still differentially expressed between  
207 SH-SY5Y and *GATA3*<sup>-/-</sup> cell xenografts, but of lower magnitude compared to the difference between the  
208 corresponding cells *in vitro*. Finally, to fully demonstrate the *in vivo* reprogramming of mesenchymal  
209 cells towards a noradrenergic identity, we determined the super-enhancer profiles of SH-SY5Y and  
210 *GATA3*<sup>-/-</sup> cell xenografts and additionally from the xenografts of SK-N-SH CD44<sup>pos</sup> and CD44<sup>neg</sup> FACS-  
211 sorted cells. The PCA clearly showed that all these tumors were part of the noradrenergic group I  
212 (**Figure 5D**). Super-enhancers marked *PHOX2B* and *HAND1* genes in xenografts of SH-SY5Y and SK-N-  
213 SH CD44<sup>neg</sup> cells but also in xenografts of *GATA3*<sup>-/-</sup> and SK-N-SH CD44<sup>pos</sup> cells (**Figure 5E**). In an *in vivo*  
214 environment, the mesenchymal cells therefore shifted back towards a noradrenergic identity  
215 indicating that the mouse microenvironment provided strong cues inducing a global epigenetic  
216 reprogramming.

217 Altogether, our analyses highlighted the plasticity properties of neuroblastoma cells using  
218 three different models (*GATA3* genetic inactivation, SK-N-SH and IC-pPDXC-63 cell lines). This plasticity  
219 was associated with a reprogramming potential from a mesenchymal state to a noradrenergic state  
220 following *in vivo* engraftment in the mouse.

221

### 222 **Single-cell transcriptomic analyses reveal intra-tumor noradrenergic heterogeneity but no** 223 **mesenchymal tumor cells in neuroblastoma PDX models**

224 Since heterogeneity of cell identity has been observed in some neuroblastoma cell lines, we  
225 took advantage of the 10X Genomics technology to explore neuroblastoma intra-tumor heterogeneity  
226 using single-cell transcriptomic analyses on 14 PDX models, obtained at diagnosis, progression or at  
227 relapse (**Figure 6A, Table S2**). The study was designed to specifically identify human tumor cells (see  
228 methods). The integration of the human cells from all models (n=47,219 cells) with the Harmony tool<sup>24</sup>  
229 highlighted tumor cells of noradrenergic identity (*PHOX2B*<sup>+</sup>, *HAND2*<sup>+</sup>) (**Figures 6B-C and S3A**). No  
230 cluster of mesenchymal tumor cells could be identified as shown by the analysis of previously  
231 published mesenchymal signatures (**Figure 6D**). The InferCNV analyses confirmed that noradrenergic  
232 tumor cells exhibited the emblematic genetic alterations of neuroblastoma such as 17q gain<sup>1</sup> (**Figure**  
233 **S3B-C**). For several models, we could compare the InferCNV profile calculated from scRNAseq data to

234 copy number profiles inferred from whole-exome sequencing data and confirmed their full consistency  
235 (**Figure S3B**). We next assessed the heterogeneity of the human tumor cell populations and  
236 documented that most clusters were shared by all PDX models (**Table S4**). Several populations could  
237 be defined according to the differential expression of specific genes: cycling cells marked by the  
238 expression of *TOP2A*, *MKI67* and *CDK1* (clusters 2 and 6), cells driven by a *MYCN/2p* amplicon signature  
239 (clusters 0-1-2-3-13), cells expressing chromaffin markers such as *CDKN1C*, *SLC18A1/VMAT1*<sup>25,26</sup> and  
240 *DLK1*<sup>27</sup> (clusters 9-10-11) and cells with a sympathoblast-like identity such as *TFAP2B*<sup>28</sup> (cluster 7)  
241 (**Figures 6E, S3D-F and Table S4**).

242 Interestingly, our single-cell transcriptomic data revealed that the GR-NB7 PDX model did not  
243 express *GATA3* but expressed *PHOX2B*, *CHGA* and *DDC* (**Figure 6F**). These data confirmed that *GATA3*  
244 was dispensable to establish a noradrenergic identity *in vivo*, in agreement with the noradrenergic  
245 shift of *GATA3*<sup>-/-</sup> cells observed in mouse xenografts. Unsupervised hierarchical clustering using the  
246 10% genes with the highest IQR on bulk RNA-seq data confirmed that all studied PDX models exhibited  
247 a transcriptomic profile corresponding to a noradrenergic identity (**Figure S3F**).

248 Altogether, the present analysis of 24 neuroblastoma samples identified no *bona fide* tumor  
249 mesenchymal cells, which is consistent with our aforementioned results demonstrating a strong  
250 pressure of the microenvironment towards a noradrenergic identity.

251

## 252 DISCUSSION

253 In the present work, we have first deciphered the distinct roles of the members of the  
254 noradrenergic CRC in shaping neuroblastoma cell identity. Whereas *Phox2b* is essential for initial  
255 sympatho-adrenal cell specification from neural crest progenitors<sup>29-31</sup>, the KO of *PHOX2B* or *PHOX2A*  
256 did not modify the noradrenergic identity of SH-SY5Y cells. Yet, one hypothesis is functional  
257 redundancy between *PHOX2A* and *PHOX2B*. Of note, we did not succeed in obtaining double KO clones  
258 suggesting synthetic lethality for the cells. In contrast, the KO of *GATA3* in the same cells had a dramatic  
259 effect, inducing the collapse of the noradrenergic CRC. Surprisingly, whereas *GATA3* KO clones  
260 harbored mesenchymal properties *in vitro*, they reacquired a noradrenergic identity *in vivo* indicating  
261 that *GATA3* KO allows a permissive epigenetic state and the transdifferentiation towards a  
262 mesenchymal or noradrenergic state according to non-autonomous cues. Consistently with these  
263 observations, we could document a noradrenergic identity of one neuroblastoma PDX model  
264 characterized by an absence of *GATA3* expression. In a previous study using siRNA and short-term  
265 transcriptomic analysis by RT-q-PCR, Durbin *et al.* reported that the knock-down of only one member  
266 of the CRC was able to induce a decrease of the expression of several members of the CRC<sup>15</sup>. Yet,



267 residual expression remained for the different TFs studied and the impact of this decrease on cell  
268 identity has not been explored. Therefore, our results constitute the first evidence that TFs of a specific  
269 CRC may have distinct roles in shaping cell identity in neuroblastoma.

270 Transdifferentiation from the noradrenergic to the mesenchymal identity has been shown  
271 previously *in vitro* following overexpression of the PRRX1 TF<sup>13</sup>. The same team also recently pointed  
272 out a role of the NOTCH signaling pathway in this process<sup>32</sup>. Of note, xenografts of SH-SY5Y cells  
273 overexpressing NOTCH3 intracellular domain exhibited a mesenchymal identity. In this model, the  
274 permanent production of intra-cellular NOTCH3 likely activates an endogenous feed-forward loop  
275 between NOTCH receptors and ligands *in vivo*. Although we observed expression of several members  
276 of this pathway (*NOTCH2*, *MAML2*, *HES1*) in our mesenchymal tumor cells *in vitro*, in our series of PDX  
277 models, only expression of *MAML2* could be detected in some tumor cells; yet these cells were not  
278 associated with a specific cluster and very sparse expression was observed for *NOTCH2* and *HES1* in the  
279 whole population of tumor cells.

280 We document here the heterogeneity and spontaneous reprogramming potential of cells of  
281 IC-PDXC-63 and SK-N-SH models from a noradrenergic to a mesenchymal identity and conversely.  
282 Single-cell transcriptomic analysis performed on these models first identified CD44 as a surface marker  
283 specific of the mesenchymal identity, further allowing the use of this marker to sort each population  
284 and analyze their respective proportions by FACS. We show that the spontaneous and bi-directional  
285 plasticity observed *in vitro* relies on a profound epigenetic reprogramming, as revealed by the analysis  
286 of the super-enhancer landscape of the various cell populations. Very strikingly, we demonstrate that  
287 mesenchymal tumor cells from three different models exhibiting plasticity revert their identity towards  
288 a noradrenergic state when engrafted in mice. These results highlight that neuroblastoma cell  
289 phenotype is strongly influenced by the *in vivo* microenvironment which provides a powerful pressure  
290 towards a noradrenergic state. This conclusion is reinforced by the observation that mesenchymal  
291 tumor cells were not identified by single-cell transcriptomic analyses in our series of 14 neuroblastoma  
292 PDX models, obtained either at diagnosis or at relapse and presenting various genetic alterations.  
293 Altogether, our data obtained on a variety of cellular models and PDXs provide a biological explanation  
294 for the absence of mesenchymal tumor cells *in vivo*. This observation is also in line with the very recent  
295 study performed by Dong and colleagues that identified normal, but not tumor, mesenchymal cells in  
296 adrenal neuroblastoma tumors by single-cell RNA sequencing<sup>33</sup>. Interactions between tumor cells and  
297 several cell populations of the microenvironment may influence the tumor cell phenotype and play a  
298 role in tumor progression, as previously demonstrated for tumor-associated inflammatory cells<sup>34</sup>.  
299 Future studies should decipher the cues of the microenvironment and their associated pathways that  
300 converge to regulate cell plasticity during tumor progression.

301            Interestingly, some evidences suggested that treatments against neuroblastoma may impact  
302 cell identity. Indeed, previous analyses of neuroblastoma cells selected to be resistant to cisplatin<sup>35</sup> or  
303 ALK inhibitors<sup>36</sup> *in vitro* have reported that noradrenergic cells may acquire mesenchymal properties.  
304 Cells exhibiting such a potential may be transiently induced upon chemotherapy treatment and revert  
305 their state towards a noradrenergic identity when the treatment pressure decreases, the  
306 mesenchymal cells being the drug-resistant reservoirs for noradrenergic cells. Further experiments will  
307 allow better defining their contribution to therapeutic resistance and relapse in high-risk  
308 neuroblastomas.

309            The cell of origin in neuroblastoma has been for long a matter of debate<sup>37–39</sup>. Some models  
310 argue that this tumor arises from the transformation of NCCs while other models suggest that they  
311 develop from more engaged sympatho-adrenal progenitors, able to generate both sympathetic  
312 neurons and neuroendocrine cells of the adrenal. Recently, this hierarchical dogma of normal  
313 differentiation has been questioned with the identification of a population of Schwann cell precursors  
314 (SCPs) as the main reservoir of adrenal chromaffin cells in the mouse<sup>26</sup>. In their recent paper, Dong et  
315 al. who analyzed human fetal adrenal gland at the single-cell level, in addition to adrenal  
316 neuroblastoma tumors, concluded that malignant cells had a predominant chromaffin-cell-like  
317 phenotype<sup>33</sup>. We nevertheless disagree with their interpretation of cell phenotypes. We strongly  
318 believe that *CARTPT* and *INSM1*, used by Dong et al. to define sympathoblast identity, rather witness  
319 a chromaffin-like phenotype, since they are co-expressed with *DLK1*, *CDKN1C*, *CHGA/CHGB*, *TH*, *DBH*  
320 and *SLC18A1* in our data<sup>25–27,40–44</sup>. Integration of our single-cell RNA-seq data from 14 PDX models  
321 revealed two distinct cell populations expressing either markers of chromaffin cells or markers of  
322 sympathoblasts. Of note, SCP markers such as *SOX10*, *S100B*, *PLP1* and *ERBB3*<sup>26</sup> were not detected in  
323 our cohort of 14 neuroblastoma cases. Nevertheless, it remains difficult to infer which cell type is the  
324 one targeted by neoplastic transformation. Indeed, it cannot be excluded that transitions may occur  
325 between chromaffin cells and sympathoblasts during development and/or that markers of a specific  
326 precursor may be lost during cell transformation.

327            Altogether, our data obtained on several cellular models demonstrate that a subset of  
328 neuroblastoma cells exhibits a reprogramming potential between a noradrenergic and a mesenchymal  
329 identity and that both intrinsic properties and exogenous signals of the microenvironment dictate this  
330 identity. A better understanding of the molecular factors that control phenotypic plasticity will  
331 represent a key step in the design of more efficacious therapies that aim at improving the outcome of  
332 neuroblastoma patients with high-risk disease.

333

334 **ACKNOWLEDGEMENTS**

335 This work was supported by grants from Institut Curie, Inserm, the Ligue Nationale Contre le Cancer  
336 (Equipe labellisée), the Institut National du Cancer (PLBIO18-273) and by the following associations:  
337 Association Hubert Guoin-Enfance et Cancer, Les Bagouz à Manon, les amis de Claire, Courir pour  
338 Mathieu, Dans les pas du Géant, Olivier Chape. The Mappyacts protocol is supported by the Institut  
339 National de Cancer (INCa) through the PHRC “INCa-DGOS\_8519” MERRI, the Fondation ARC, the  
340 Association Imagine for Margo, the Société Française de lutte contre les Cancers et les leucémies de  
341 l’Enfant et l’adolescent (SFCE), Fédération Enfants & Santé, the associations AREMIG and Thibault  
342 BRIET. The Micchado protocol is supported by PRT-K, Association Imagine for Margo, Kickcancer,  
343 Hubert Guoin-Enfance et Cancer, Fédération Enfants & Santé, and funding support by BMS and Roche.  
344 High-throughput sequencing has been performed by the ICGex NGS platform of the Institut Curie  
345 supported by the grants ANR-10-EQPX-03 (Equipex) and ANR-10-INBS-09-08 (France Génomique  
346 Consortium) from the Agence Nationale de la Recherche ("Investissements d’Avenir" program), by  
347 ITMO Cancer Aviesan (“Equipe pour la recherche en Cancérologie” program) and by the SiRIC-  
348 Curie program -SiRIC Grant “INCa-DGOS- 4654”. G.S. is supported by the Annenberg foundation. H.R.  
349 is supported by the Wilhelm-Sander-Stiftung. We are grateful to the animal facilities team, the  
350 Experimental Pathology Department, the Plateforme Génomique and the Plateforme Cytométrie of  
351 Institut Curie, U900 colleagues for help with alignment of NGS data and Julien Masliah-Planchon for  
352 help with genomic analyses. We thank Mélissa Saichi and Divya Sahu for preliminary analyses of single-  
353 cell RNA-seq and CHIP-seq data.

354

355 **AUTHOR CONTRIBUTIONS**

356 Conceptualization: C.T., V.B., O.D. and I.J.-L.; Methodology: C.T., A.P., S. Z., N.G., I. J., A.M.C., B.G. and  
357 D.S.; Formal Analysis: C.T., A.K., A.C., S.G.-L., V.B.; Investigation: C.T., A.P., S.D., C.L.-B., C.P.-E., A.C.,  
358 A.G., N.G. and H.R.; Resources: E.L., G.P., H.B., A.G., P.F., L.G. B., V.R., S.B., A. B., J.B and G.S.; Writing  
359 – Original Draft: C.T., A.P. and I.J.-L.; Writing – Review and Editing: C.T., A.P., C.L.-B., H.R., O.D. and I.J.-  
360 L.; Visualization: C.T., A.P., A.K., C.L.-B., C.P.-E.; Supervision: C.T. and I.J.-L.; Project Administration: I.J.-  
361 L.; Funding Acquisition: I.J.-L, V. B. and O.D.

362

363 **DECLARATION OF INTERESTS**

364

365 The authors declare no potential conflicts of interest.

366

**Figure 1**

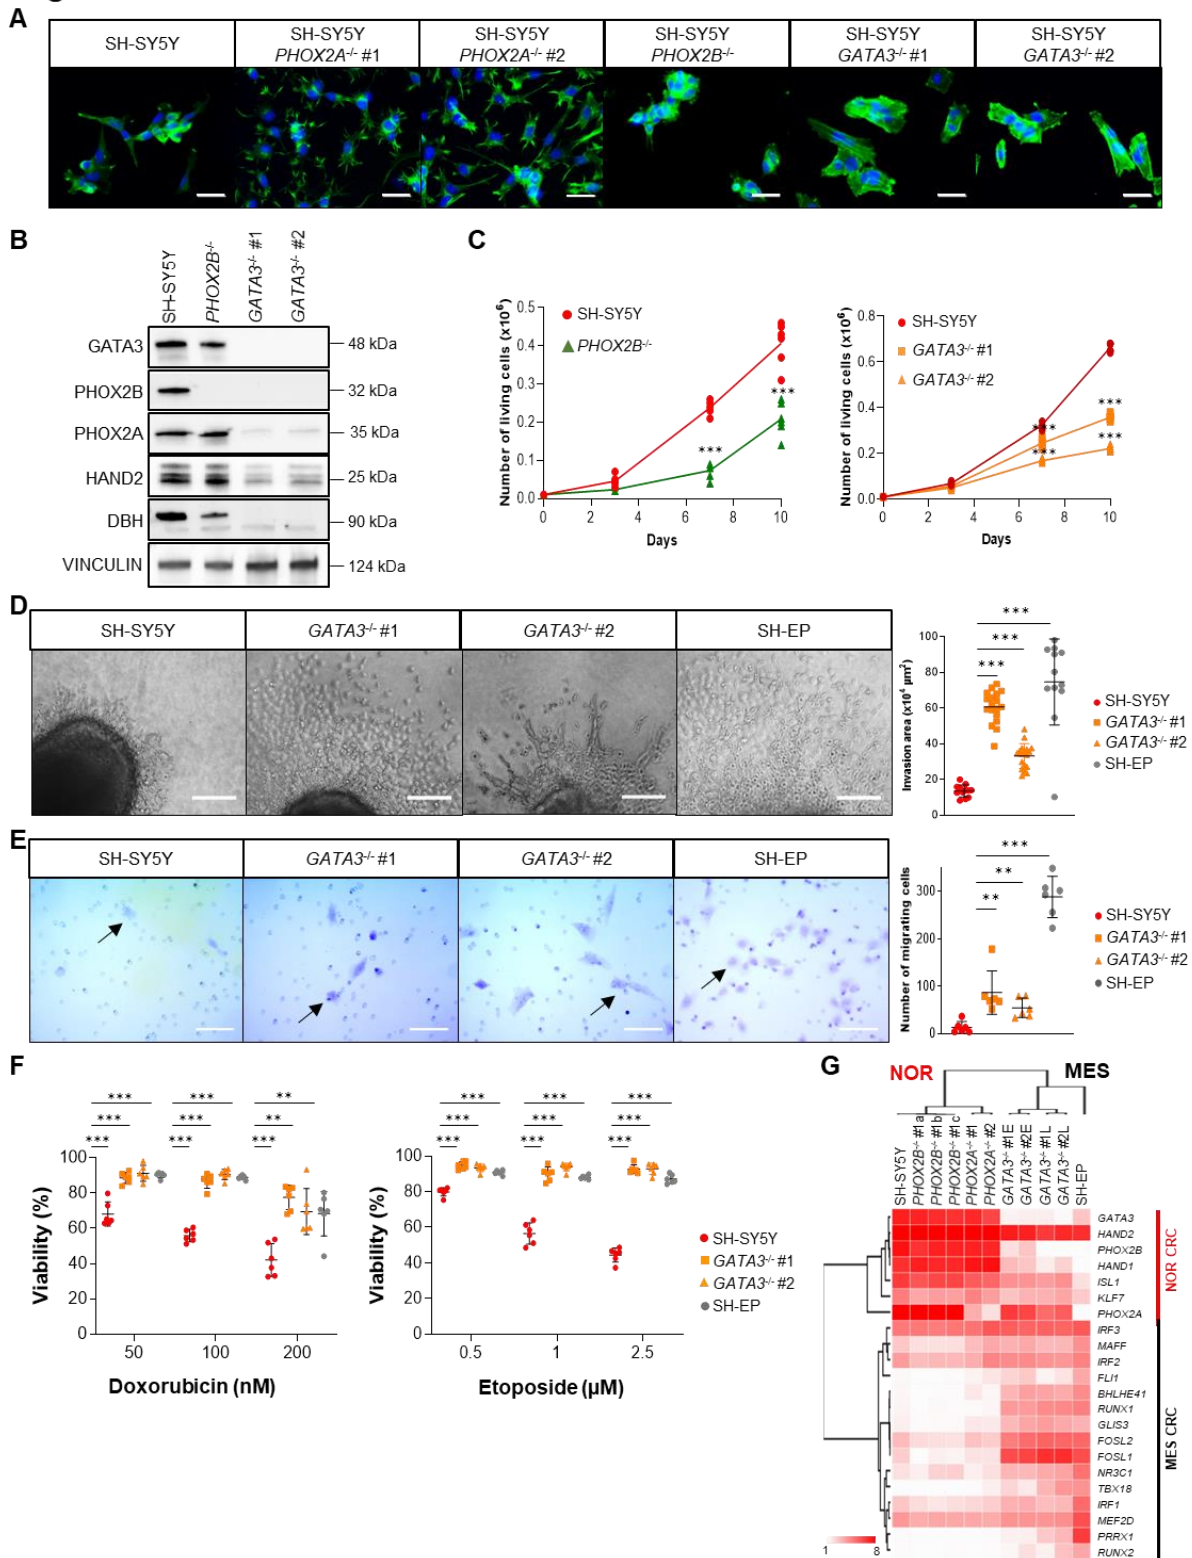

367

368

369

370

371

**Figure 1. *GATA3*<sup>-/-</sup> cells exhibit mesenchymal properties whereas *PHOX2B*<sup>-/-</sup> or *PHOX2A*<sup>-/-</sup> cells keep a noradrenergic phenotype *in vitro*.** (A) Phalloidin staining reveals the cell phenotype of the different KO clones and the SH-SY5Y parental cell line (x400, scale bar = 20 μm). (B) Western blot analysis of GATA3, PHOX2B, PHOX2A, HAND2 and DBH in the *PHOX2B*<sup>-/-</sup> and *GATA3*<sup>-/-</sup> clones, with Vinculin as a

372 loading control. **(C)** Proliferation curves for *PHOX2B*<sup>-/-</sup> and *GATA3*<sup>-/-</sup> cells *in vitro*. 10,000 cells were  
373 seeded in 24-well plates. Living cells were counted after 3, 7 and 10 days of culture (mean ± sd.; n = 6  
374 replicates). **(D)** Representative images (left) and quantification (right) of spheroid invasion assays. Cells  
375 were seeded in low adherent plates to form neurospheres for 4 days and embedded in collagen I for  
376 72h. Scale bar = 100 μm (mean ± sd.; n = 12 replicates for SH-SY5Y and SH-EP cell lines and n = 18  
377 replicates for *GATA3*<sup>-/-</sup> clones #1 and #2). **(E)** Representative images (left) and quantification (right) of  
378 transwell assays for the SH-SY5Y cells, the *GATA3*<sup>-/-</sup> clones (#1 and #2) and mesenchymal control cells  
379 (SH-EP). 50,000 cells were plated in a transwell insert and the living cells that have migrated into the  
380 transwell membrane were counted 24h later. Scale bar = 20 μm (mean ± sd.; n = 6 replicates). Each  
381 dot represents a replicate and is the mean of 6 different images of the well. **(F)** *GATA3*<sup>-/-</sup> cells are more  
382 resistant to chemotherapy than the SH-SY5Y noradrenergic parental cell line. Cell viability was  
383 measured after 48 hours of chemotherapy treatments (Doxorubicin 50, 100, 200 nM and Etoposide  
384 0.5, 1, 2.5 μM) (mean ± sd.; n = 6 replicates). **(G)** Heatmap showing the expression levels of the TFs of  
385 the noradrenergic (n=7) and mesenchymal (n=15) CRC in the *PHOX2B*<sup>-/-</sup> (clone#1, 3 replicates),  
386 *PHOX2A*<sup>-/-</sup> (clones #1 and #2) and *GATA3*<sup>-/-</sup> (clones #1 and #2). Both *GATA3*<sup>-/-</sup> clones were analyzed at  
387 two different time points (early (E) and late (L)). The noradrenergic SH-SY5Y and the isogenic  
388 mesenchymal SH-EP cell lines were also included in the analysis. P-values were determined via two-  
389 tailed unpaired Welch's t-test (\*\*: p<0.01, \*\*\*: p<0.001).

390

**Figure 2**

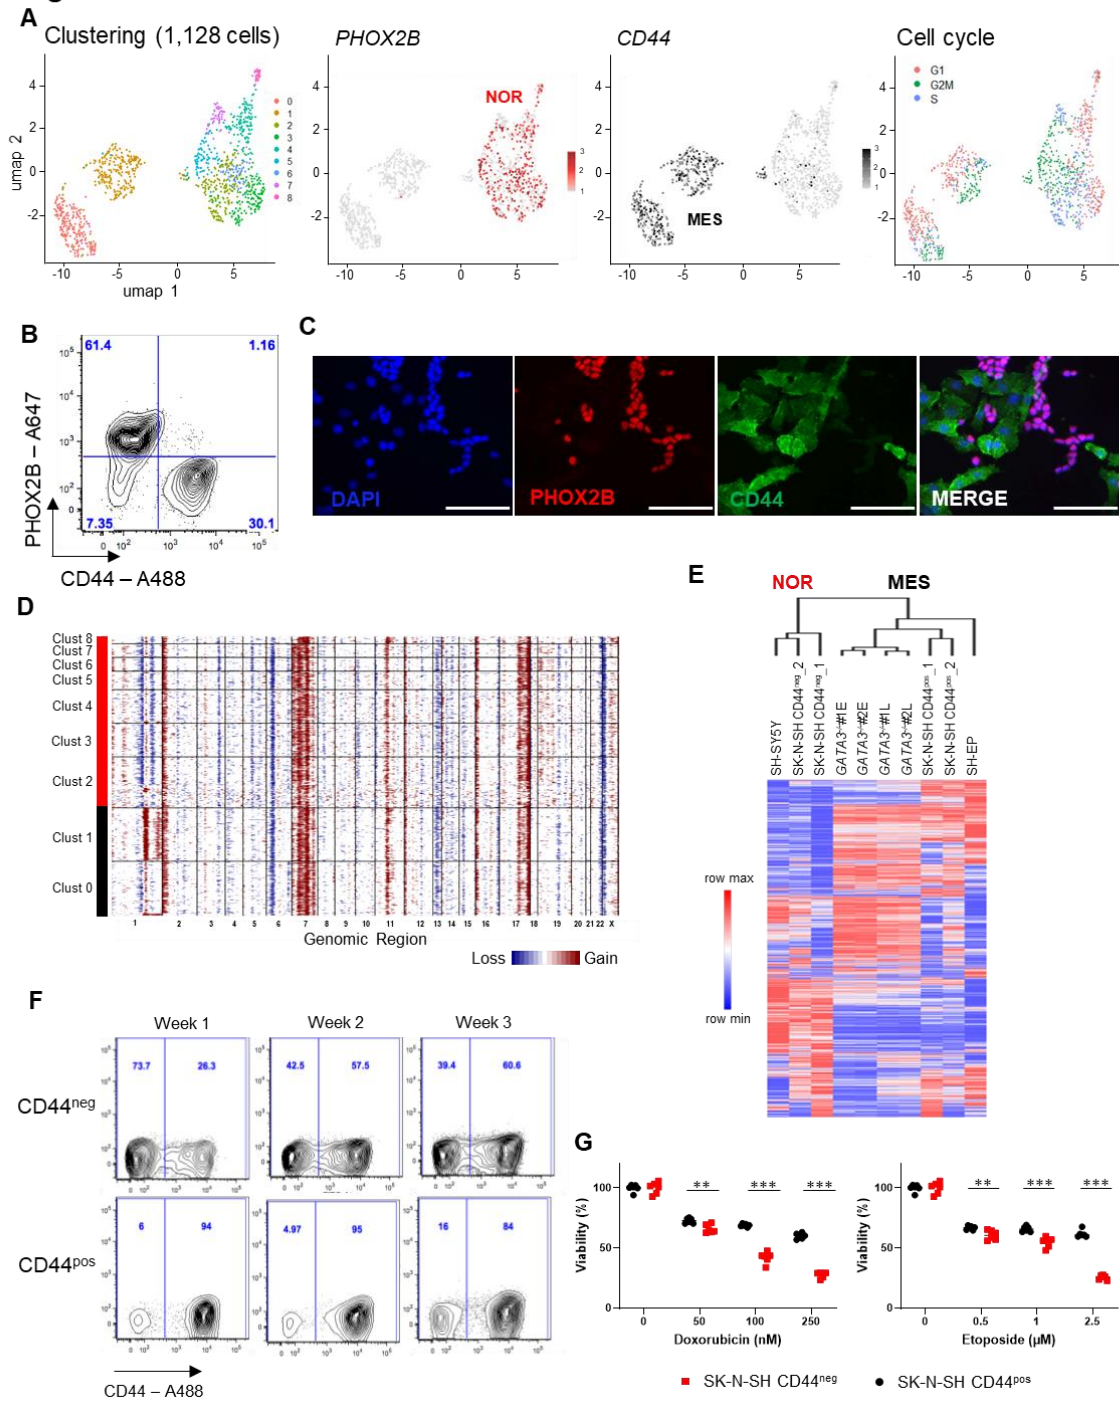

391

392 **Figure 2. Cell plasticity in the heterogeneous neuroblastoma SK-N-SH cell line.** (A) Single-cell RNA-  
 393 seq analysis by Seurat. The umap plot shows two main clusters, *PHOX2B* and *CD44* expression  
 394 distinguish noradrenergic and mesenchymal cells, each identity including cycling cells. (B), (C) FACS  
 395 and immunofluorescence analyses of the SK-N-SH cell line with the *PHOX2B* and *CD44* markers (scale  
 396 bar= 50 μm). (D) Genetic alterations were predicted from single-cell RNAseq data using the InferCNV  
 397 tool. (E) Unsupervised clustering using the top 10% of genes with the highest IQR (Inter-Quartile Range)  
 398 indicates that *CD44*<sup>neg</sup> and *CD44*<sup>pos</sup> sorted cells (two replicates) exhibit a transcriptomic profile close to

399 the noradrenergic SH-SY5Y and mesenchymal SH-EP cells, respectively. **(F)** CD44<sup>neg</sup> (upper panel) and  
400 CD44<sup>pos</sup> (lower panel) sorted cells are able to reconstitute a heterogeneous population of both CD44<sup>neg</sup>  
401 and CD44<sup>pos</sup> cells after a few weeks in culture. **(G)** Mesenchymal/CD44<sup>pos</sup> sorted cells are more resistant  
402 to doxorubicin and etoposide than noradrenergic/CD44<sup>neg</sup> cells. Cell viability was measured after 72  
403 hours of chemotherapy treatments (Doxorubicin 50, 100, 250 nM and Etoposide 0.5, 1, 2.5  $\mu$ M)) (mean  
404  $\pm$  sd.; n = 6 replicates). P-values were determined via two-tailed unpaired Welch's t-test (\*\*: p<0.01;  
405 \*\*\*: p<0.001).

406

**Figure 3**

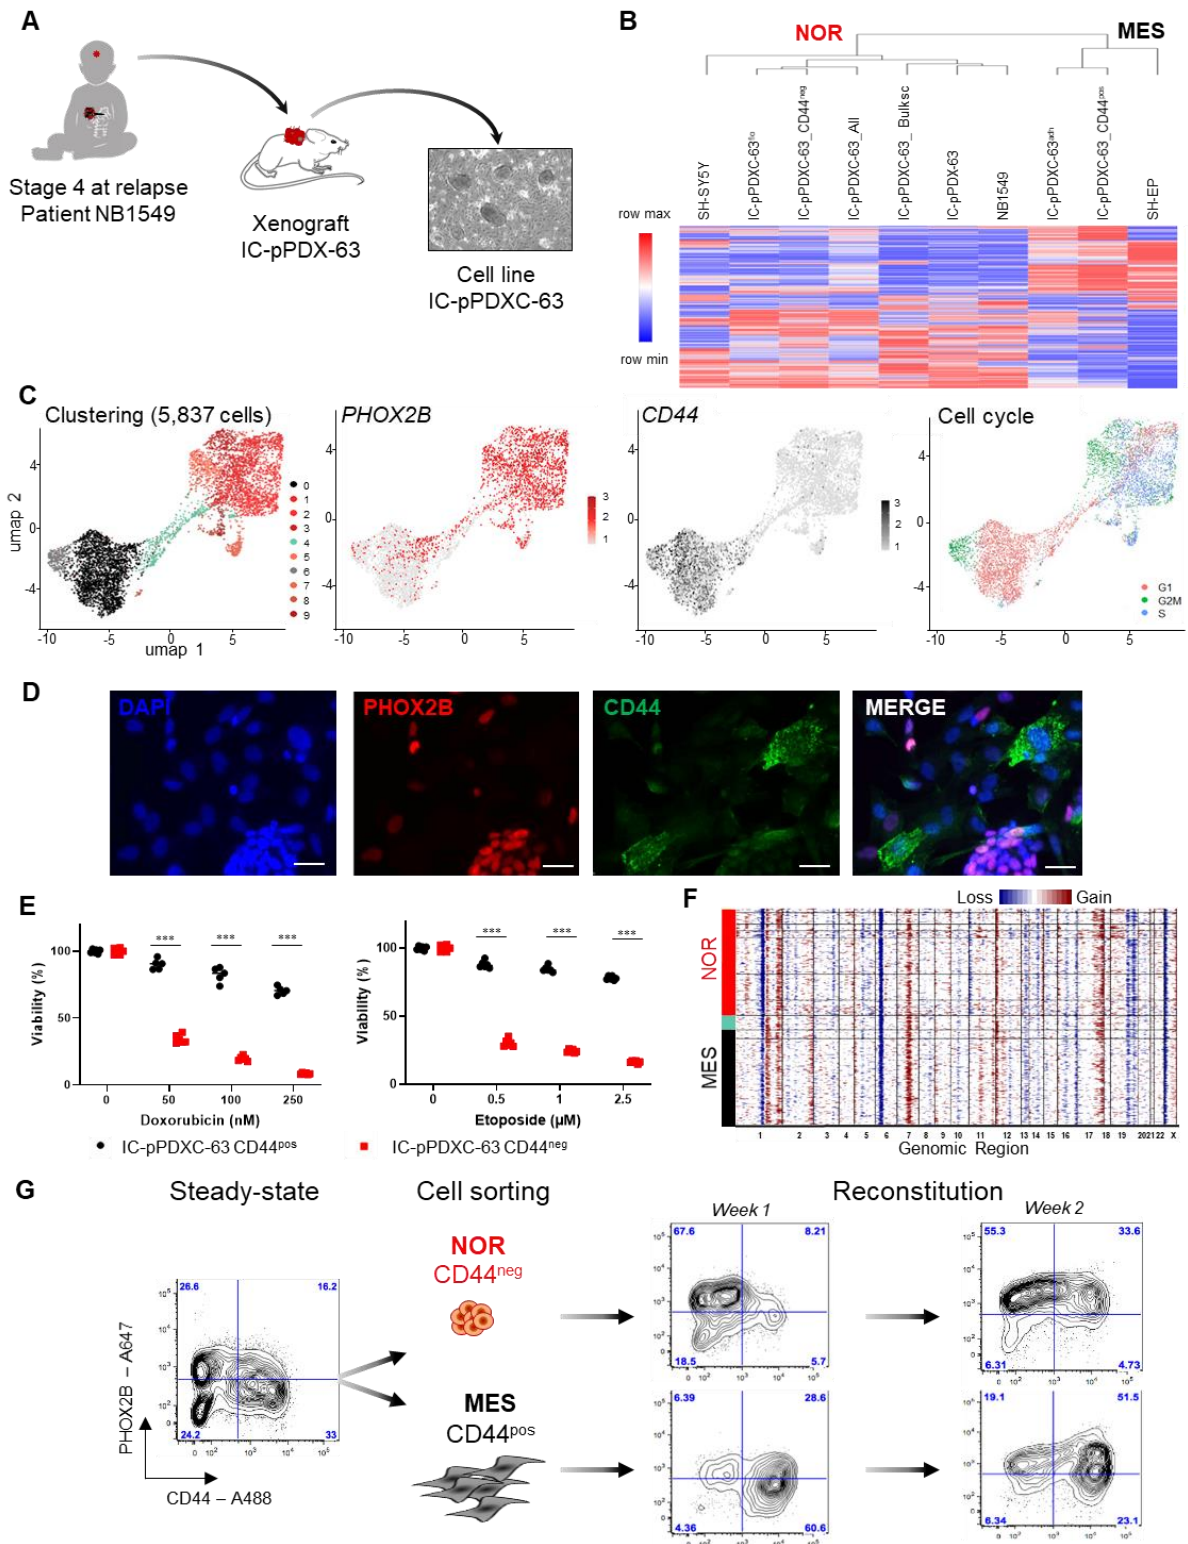

407

408 **Figure 3. The IC-pPDX-63 model exhibits a phenotypic plasticity between noradrenergic and**  
 409 **mesenchymal identities. (A) Ex vivo culture of the noradrenergic IC-pPDX-63 neuroblastoma model**  
 410 **includes floating neurospheres and adherent cells. (B) Unsupervised clustering using the top 10% of**  
 411 **genes with the highest IQR (Inter-Quartile Range) shows that the transcriptomic profile of the IC-pPDX-**



412 63 model and its derived-cell line (IC-pPDXC-63) are highly similar to that of the patient's tumor  
413 (NB1549) from which it has been generated. **(C)** Single-cell transcriptomic analyses by Seurat highlight  
414 both noradrenergic and mesenchymal clusters in the IC-pPDXC-63 cell line together with a bridge in-  
415 between. Four umap plots are shown (from left to right): the cell clustering, *PHOX2B* expression  
416 marking noradrenergic cells, *CD44* expression marking mesenchymal cells and the cell cycle. **(D)**  
417 Immunofluorescence shows the specific expression of the PHOX2B and CD44 markers by neurospheres  
418 and adherent cells, respectively (scale bar = 20  $\mu\text{m}$ ). **(E)** Mesenchymal (IC-pPDXC-63 CD44<sup>pos</sup>) cells are  
419 more resistant to chemotherapy than noradrenergic (IC-pPDXC-63 CD44<sup>neg</sup>) cells. Cell viability was  
420 measured with resazurin assay after 72 hours of chemotherapy treatments ((Doxorubicin 50, 100, 250  
421 nM and Etoposide 0.5, 1, 2.5  $\mu\text{M}$ )) (mean  $\pm$  sd.; n = 6 replicates). P-values were determined via two-  
422 tailed unpaired Welch's t-test (\*\*: p<0.01; \*\*\*: p<0.001). **(F)** Inferred genomic profile of the IC-pPDXC-  
423 63 cell line obtained with InferCNV on single-cell data. **(G)** Plasticity properties of the IC-pPDXC-63 cell  
424 line. CD44<sup>pos</sup> and CD44<sup>neg</sup> cells were FACS sorted and put back in culture. Each sorted population  
425 reconstituted a heterogeneous cell population after several days in culture.

426

**Figure 4**

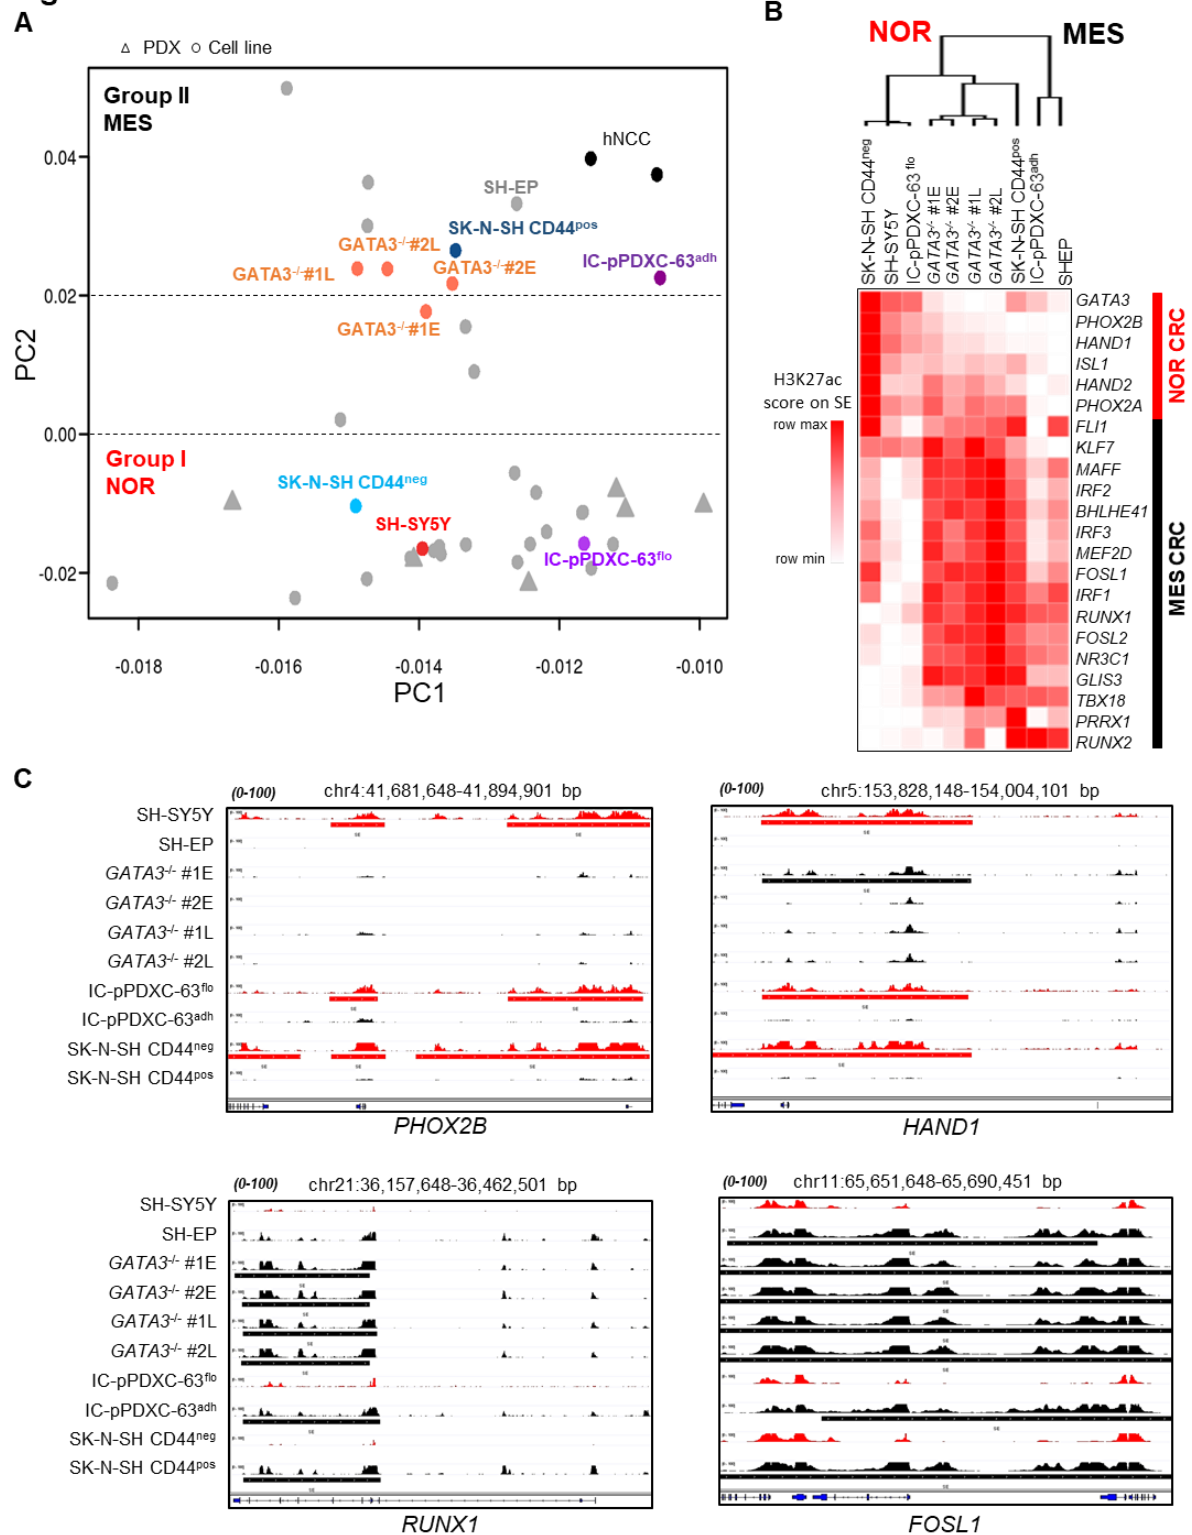

427

428 **Figure 4. Phenotypic plasticity relies on epigenetic reprogramming.** (A) Principal Component Analysis  
 429 (PCA) based on neuroblastoma and hNCC super-enhancer log scores<sup>12</sup> that discriminates the two  
 430 neuroblastoma cell groups I (noradrenergic-NOR) and II (NCC-like/mesenchymal-MES) and in which  
 431 were added the two *GATA3*<sup>-/-</sup> clones at early (E) and late (L) time points as well as the floating and

432 adherent cells of the IC-pPDXC-63 and CD44<sup>neg</sup> and CD44<sup>pos</sup> sorted cells of the SK-N-SH cell lines. **(B)**  
433 Heatmap showing the H3K27ac signal on the super-enhancer regions of the TFs of the noradrenergic  
434 (NOR) and mesenchymal (MES) CRC in the two *GATA3*<sup>-/-</sup> at both early (E) and late (L) time points, in  
435 floating and adherent cells of the IC-pPDXC-63 cell line and in the CD44<sup>pos</sup> and CD44<sup>neg</sup> sorted cells of  
436 the SK-N-SH cell line, and the SH-SY5Y and SH-EP control cell lines. For the TFs associated with several  
437 super-enhancers, the signal was summarized as described in the Methods section to have one value  
438 per TF. The unsupervised hierarchical clustering based on H3K27ac signals discriminated noradrenergic  
439 and mesenchymal TFs and cell identity. **(C)** Tracks of ChIP-seq profiles for H3K27ac at *PHOX2B*, *HAND1*,  
440 *RUNX1*, and *FOSL1* super-enhancers in the SH-SY5Y, SH-EP, the 4 *GATA3*<sup>-/-</sup> samples (2 at early (E) and  
441 2 at late (L) time-points), the floating and adherent IC-pPDXC-63 cells and the CD44<sup>pos</sup> and CD44<sup>neg</sup>  
442 sorted SK-N-SH cells.  
443

**Figure 5**

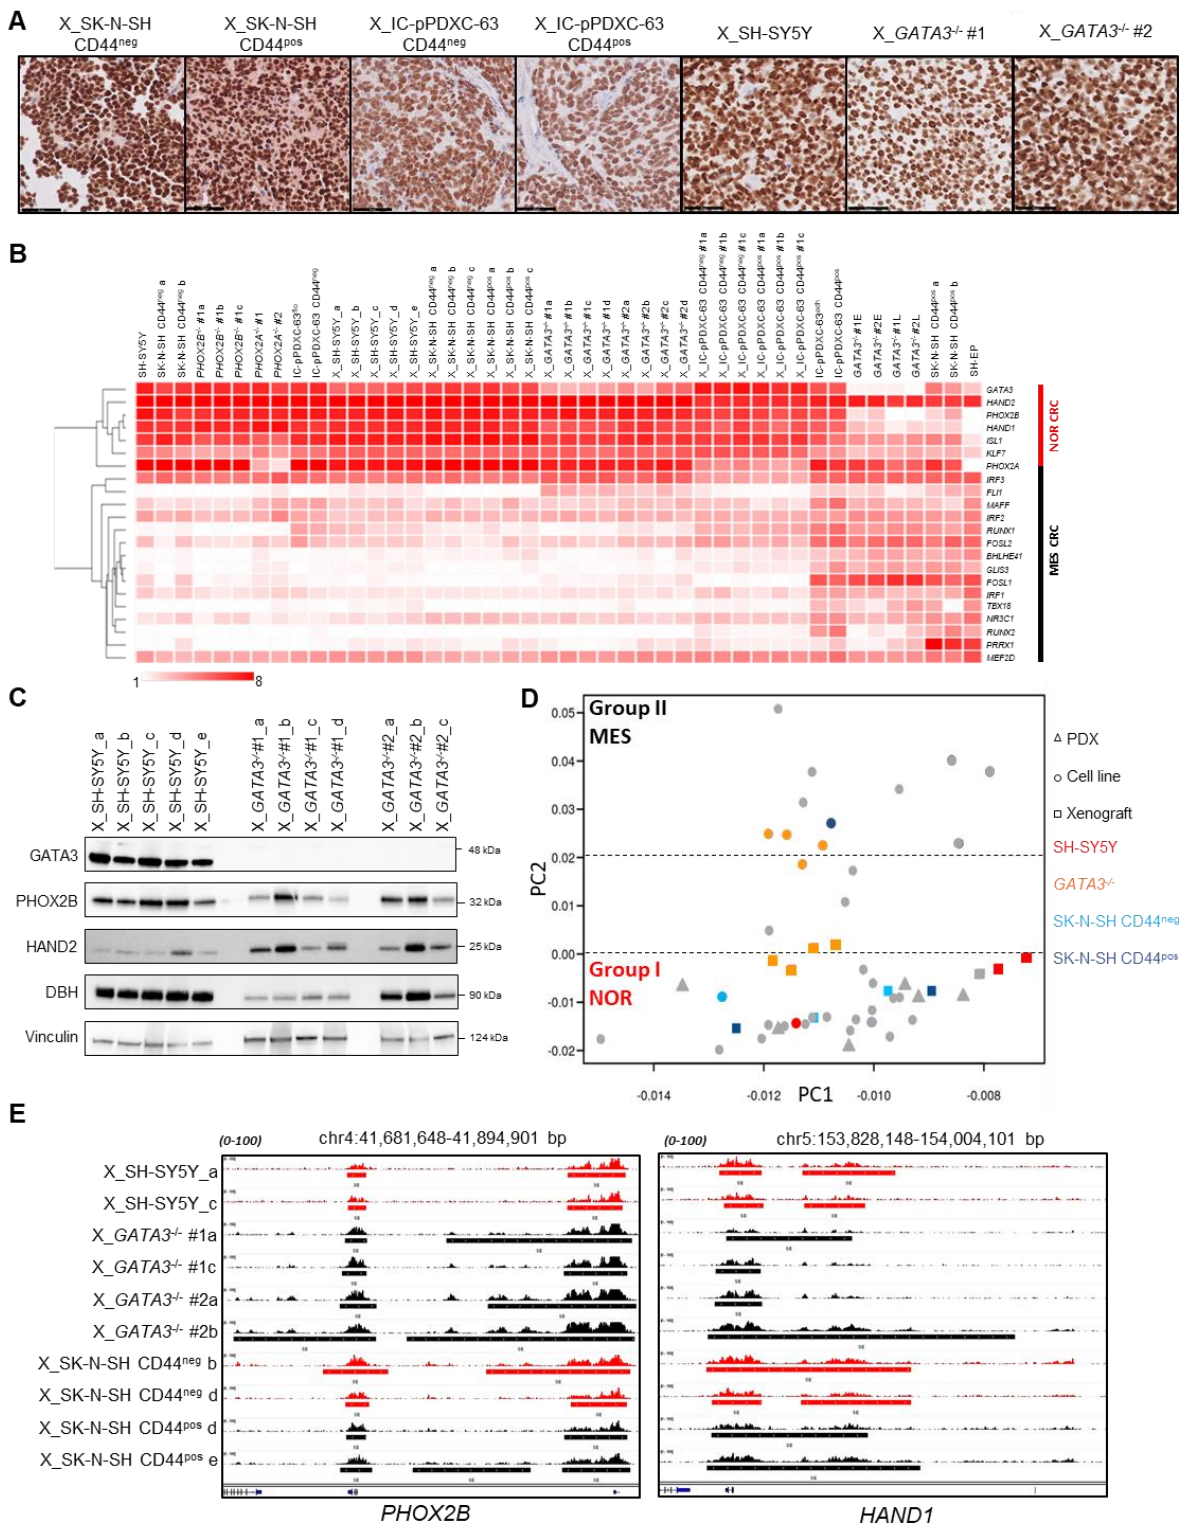

444

445 **Figure 5. All sorted mesenchymal cells from the 3 models, SK-N-SH and IC-pPDXC-63 cell lines and**  
 446 **GATA3<sup>-/-</sup> cells, adopt a noradrenergic identity when engrafted in mouse. (A) PHOX2B**  
 447 **immunohistochemistry of one representative mouse xenograft per group (CD44<sup>neg</sup> or CD44<sup>pos</sup> sorted**  
 448 **cells of SK-N-SH and IC-pPDXC-63 cell lines, SH-SY5Y control cells and GATA3<sup>-/-</sup> clones #1 and #2). Scale**

449 bar = 50  $\mu$ m. Similar results were obtained for all analyzed xenografts. **(B)** Heatmap showing the  
450 expression of the TFs associated with the noradrenergic or mesenchymal identity<sup>12</sup> reveals that all  
451 mouse xenografts exhibit a noradrenergic transcriptomic profile. **(C)** Western-blot analysis of GATA3,  
452 PHOX2B, HAND2 and DBH in the SH-SY5Y (n=5) and *GATA3*<sup>-/-</sup> clone xenografts (*GATA3*<sup>-/-</sup>#1: n=4; *GATA3*<sup>-/-</sup>  
453 #2: n=3) with Vinculin as a loading control. **(D)** PCA as in **Figure 4A** in which were added the xenografts  
454 of the SH-SY5Y and *GATA3*<sup>-/-</sup> clones and the CD44<sup>pos</sup> or CD44<sup>neg</sup> sorted cells of the SK-N-SH cell line. **(E)**  
455 Tracks of CHIP-seq profile for H3K27ac at *PHOX2B* and *HAND1* super-enhancers in the xenografts of  
456 the following cells: SH-SY5Y, *GATA3*<sup>-/-</sup> clones and SK-N-SH cell populations sorted according to CD44  
457 expression.

458

## Figure 6

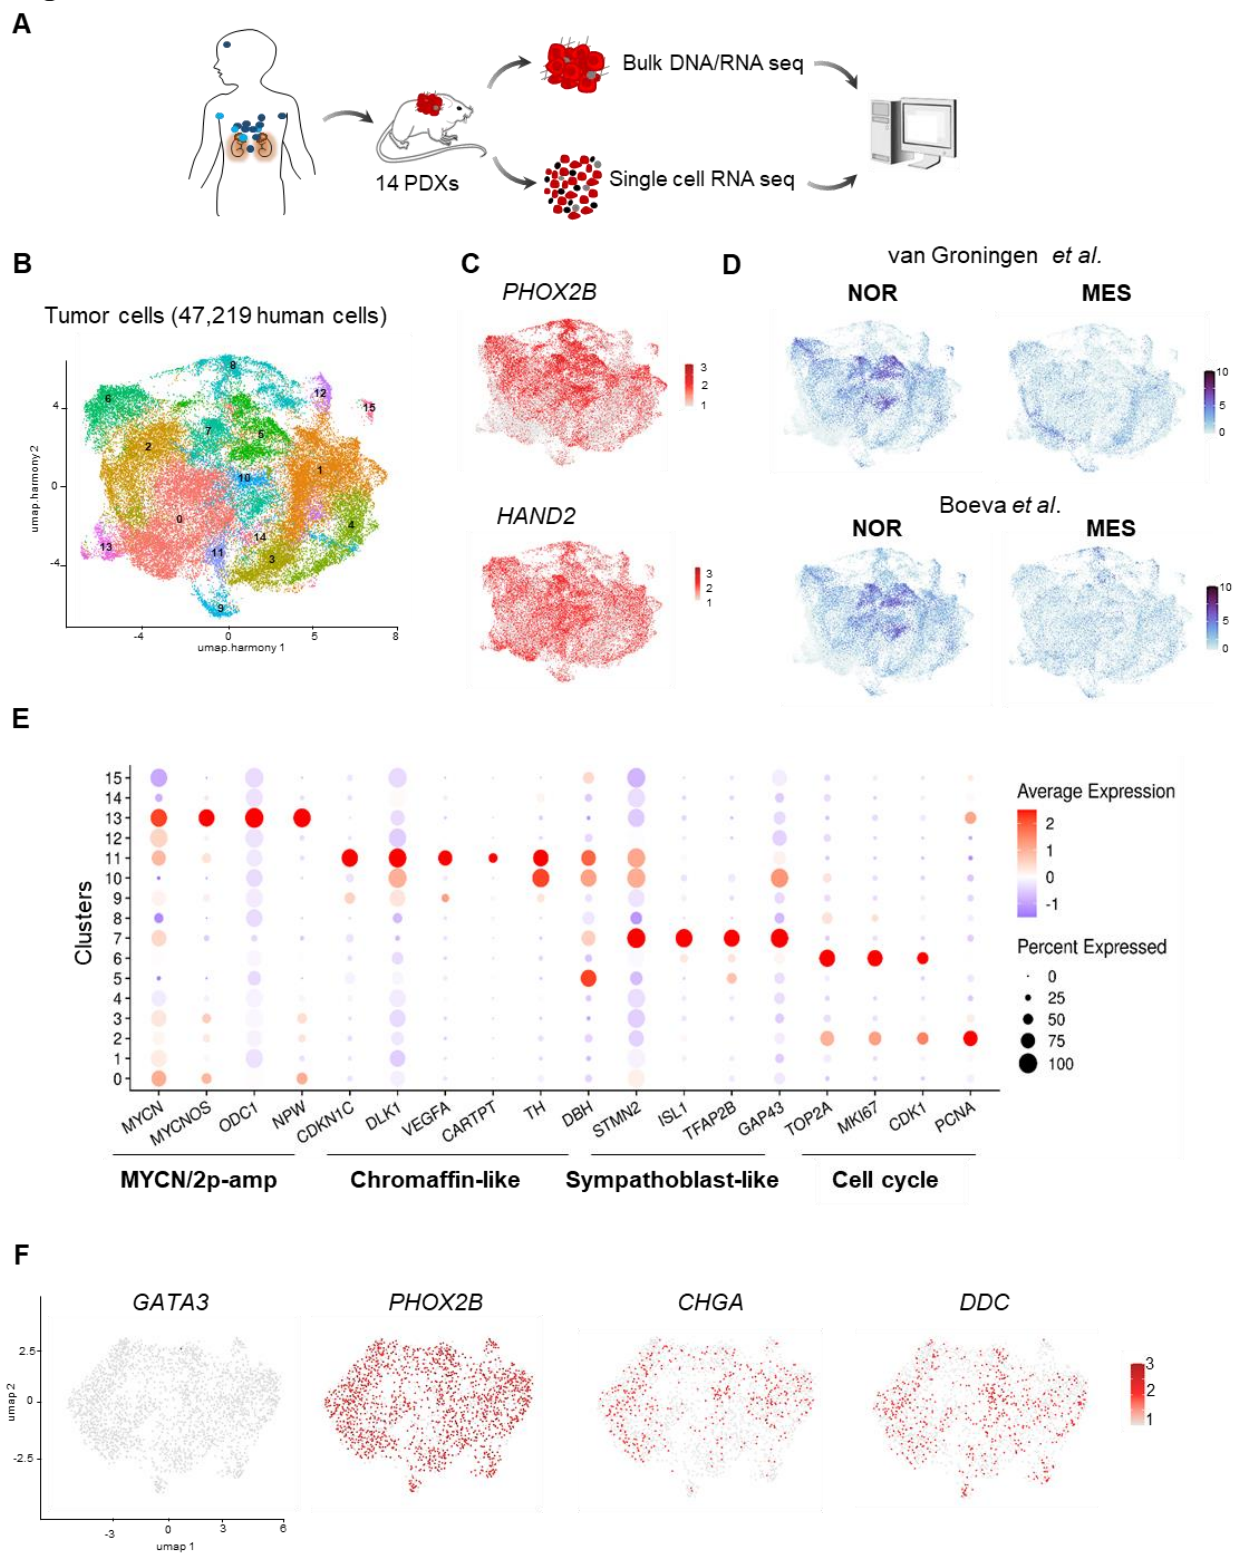

459

460 **Figure 6. Single-cell transcriptomic analyses of 14 PDX models.** (A) Schematic illustration of the overall  
 461 procedure. scRNA-seq was performed for 14 neuroblastoma PDX models obtained either at diagnosis  
 462 (light blue) or at relapse (dark blue) after tumor cell dissociation. In parallel, CNV profiles and global  
 463 transcriptomes were established from the DNA and RNA of the bulk of the tumor. (B) Uniform manifold

464 approximation and projection (umap) of the 47,219 human cells obtained after the integration by  
465 Harmony of the 14 PDX models. (C) *PHOX2B* and *HAND2* expression within the noradrenergic tumor  
466 cells. (D) Plots of published noradrenergic (NOR) and mesenchymal (MES) signatures<sup>12,13</sup>. (E) Dot plot  
467 graph illustrating cluster-specific gene expression. Four main populations of tumor cells could be  
468 defined. (F) The GR-NB7 PDX model does not express *GATA3* but exhibits a noradrenergic phenotype  
469 as shown by the plot of *PHOX2B*, *CHGA* and *DDC* expression in the scRNAseq data.

470 **MATERIAL AND METHODS**

471

472 **RESOURCE AVAILABILITY**

473 **Lead Contact**

474 Further information and request for resources should be directed to and will be fulfilled by the Lead  
475 Contact, Isabelle Janoueix-Lerosey (isabelle.janoueix@curie.fr).

476

477 **Material availability**

478 Availability of the IC-pPDXC-63 model generated in this study is subjected to a Material Transfer  
479 Agreement.

480

481 **Data and code availability**

482 ChIP-seq (RRID:SCR\_001237) data of cell lines and xenografts (34 samples) are available in Gene  
483 Expression Omnibus (GEO, RRID:SCR\_005012) under the accession number GSE154907.

484 All single-cell RNA-seq from PDXs, all RNA-seq and the ChIP-seq data on the IC-pPDXC-63 cell line are  
485 available in European Genome-Phenome Archive (EGA) under the accession number  
486 EGAS00001004781 (ongoing submission).

487

488 **EXPERIMENTAL MODELS**

489 **Neuroblastoma cell lines**

490 The SK-N-SH (Cat# HTB-11, RRID:CVCL\_0531) and SH-SY5Y (Cat# CRL-2266, RRID:CVCL\_0019) cell lines  
491 have been obtained from the ATCC. The SH-EP cell line has been kindly provided by M. Schwab. Cell  
492 line authentication was done by STR profiling with PowerPlex® 16 HS System from Promega. The IC-  
493 pPDXC-63 cell line was derived from the IC-pPDX-63 model. *GATA3*<sup>-/-</sup> clones were genetically modified  
494 from the SH-SY5Y cell line. Cells were grown at 37°C with 5% CO<sub>2</sub> in a humidified atmosphere in  
495 DMEM/HIGH glucose (Cat# SH30022.01, GE Healthcare) for SK-N-SH, SH-SY5Y and *GATA3*<sup>-/-</sup> clones and  
496 in RPMI-1640 (Cat# SH30027.01, GE Healthcare) for IC-pPDXC-63 and SH-EP cell lines, with 10% FBS  
497 (Cat# SV30160.03, GE Healthcare). Cells were monthly checked by qPCR (Venor® GeM qEP 11-9250,  
498 Minerva biolabs®) for the absence of mycoplasma.

499

500 **Mouse xenograft experiments**

501 For each cell line, 5 million cells were injected subcutaneously in the flanks of 8 week-old Nude or NSG  
502 mice with a ratio of 50/50 standard medium (DMEM: Cat# SH30022.01, GE Healthcare) and BD  
503 Matrigel™ (Cat# 356234, BD Biosciences). Tumor volume was measured every 2 or 3 days with a



504 caliper. Mice were sacrificed when the tumor reached a volume of 2,000 mm<sup>3</sup> calculated as  $V = (a/2)$   
505  $* b * ((a+b)/2)$ , a and b being the largest and smallest diameters, respectively.

506 *In vivo* experiments for this study were performed in accordance with the recommendations of the  
507 European Community (2010/63/UE) for the care and use of laboratory animals. Experimental  
508 procedures were specifically approved by the ethics committee of the Institut Curie CEEA-IC #118  
509 (Authorization APAFIS#11206-2017090816044613-v2 given by National Authority) in compliance with  
510 the international guidelines.

511

## 512 **Patient-derived Xenografts (PDX models)**

513 Written informed consents for the establishment of PDXs were obtained for all patients from parents  
514 or guardians. GR-NB4 (previously named MAP-GR-A99-NB-1<sup>12</sup>), GR-NB5 (previously named MAP-GR-  
515 B25-NB-1<sup>12</sup>), GR-NB7 and GR-NB10 have been provided by Birgit Georger (Gustave Roussy, Villejuif,  
516 France). IC-pPDX-63, IC-pPDX-75, IC-pPDX-109 and IC-pPDX-112 have been developed at Institut Curie.  
517 HSJD-NB-003, HSJD-NB-004, HSJD-NB-005, HSJD-NB-007, HSJD-NB-009 and HSJD-NB-011 PDX models  
518 have been provided by Angel Carcaboso (Institut de Recerca San Joan de Déu, Barcelona, Spain). These  
519 models have been generated from patients under an Institutional Review Board-approved protocol or  
520 within a clinical trial, respectively (**Table S2**).

521

## 522 **METHOD DETAILS**

### 523 **CRISPR-Cas9 KO strategy**

524 The guide RNAs used to specifically target the *PHOX2A*, *PHOX2B* and *GATA3* genes were selected from  
525 the CRISPOR website (crispor.tefor.net) for their high predicted efficiency and specificity:  
526 CAATTCGTACGACTCGTGCG and CTTGGAATCGTCGTCCTCGG targeting *PHOX2A*,  
527 CCCAGCCATACAGGACTCGT and AAATCTTCACGGACCACGG targeting *PHOX2B*,  
528 GTACTGCGCCGCGTCCATGT and GAGCTGTACTCGGGCACGTA targeting *GATA3*. *PHOX2A*, *PHOX2B* and  
529 *GATA3* KO were performed by inducing a large deletion between exons 1 and 3, exons 1 and 2 or exons  
530 2 and 3, respectively (**Figure S1A**). To screen the KO clones, 3 pairs of primers were used per gene:  
531 surrounding the deleted region (*PHOX2A*: 5'-CCGATGGACTACTCCTACCTC-3', 5'-  
532 GCCGGCAGCTAGAAGAGATT-3', *PHOX2B*: 5'-GTTGGACAGCTCAGTTCCC-3', 5'-  
533 CCCTAGGTCCTTCTCACTCG-3', *GATA3*: 5'-GCAGAATTGCAGAGTCGTCG-3', 5'-  
534 AAGAGCTGGCTCCTACCTGT-3'), at the 1<sup>st</sup> cut site (*PHOX2A*: 5'-GGCCGATGGACTACTCCTACCT-3', 5'-  
535 GGGGGACAGTCGCATTCAC-3', *PHOX2B*: 5'-CAGCAATAAGACCAACCGCT-3', 5'-  
536 GGTTCGGGTGTGACTAGGAT-3', *GATA3*: 5'-TTGCTAAACGACCCCTCCA-3', 5'-  
537 AAATGAACCAGGAACGGCAG-3') and at the 2<sup>nd</sup> cut site (*PHOX2A*: 5'-AGCTTTGAAAACCCGGAGCC-3', 5'-  
538 CGGCTGCCAAGCCTTAAGTA-3', *PHOX2B*: 5'-TCTCAAGTCCGTCACATCGC-3', 5'-

539 ATTTCTGATCGGCCATGGGG-3', *GATA3*: 5'-TGCGAGGTAGAGATTCCCCA-3', 5'-  
540 GCTAGGATGGGAGGACATGC-3'). The guide RNAs, crRNA and the recombinant Cas9 protein were  
541 purchased from Integrated DNA Technologies. Their reconstitution, assembly and delivery to the cells  
542 were performed following manufacturer's instructions. KO efficiency was determined 2 days after cell  
543 transfection and clones were generated by plating 200 cells in 10 cm culture dishes. KO clones were  
544 verified by Sanger sequencing with the BigDye Terminator V1.1 Cycle Sequencing Kit (130-098-462,  
545 Thermo Fisher).

546

#### 547 **Phalloidin staining**

548 100,000 cells for SH-SY5Y, *PHOX2B*<sup>-/-</sup> and *PHOX2A*<sup>-/-</sup> clones, 50,000 cells for *GATA3*<sup>-/-</sup> clones were plated  
549 in a 4-well Lab-Tek chamber (Cat# 177399PK, Thermo Fisher) 24 hours before immunostaining. Cells  
550 were fixed with 4% PFA buffer, permeabilized with a 0.2% triton solution and blocked in a 1% BSA 0.1%  
551 triton solution. Phalloidin–Tetramethylrhodamine B isothiocyanate (Sigma Aldrich Cat# P1951,  
552 RRID:AB\_2315148) was used at 1:100 to stain actin filaments. DAPI (Cat# 62248, Thermo Fisher) was  
553 diluted at 1: 1,000 in ProLong™ Gold (Cat# P36930, Thermo Fisher).

554

#### 555 **Immunoblotting**

556 Proteins were extracted using a RIPA buffer (NaCl 150m M, Tris 50 mM pH=7.5, EDTA 1 mM, SDS 0.1%,  
557 deoxycholic acid 0.25%, IGEPAL 1%, PMSF 1 mM) supplemented with protease inhibitor cocktail tablets  
558 (Cat# 11836145001, Roche). 30 to 40 µg of proteins were used for Western blot analysis. The  
559 antibodies targeting the *PHOX2B* N-terminal part (Santa Cruz Biotechnology Cat# sc-376997,  
560 RRID:AB\_2813765), *PHOX2A* (Santa Cruz Biotechnology Cat# sc-81978, RRID:AB\_1127226) and *DBH*  
561 (Santa Cruz Biotechnology Cat# sc-15318) were used at 1:500. Anti-*GATA3* (Cell Signaling Technology  
562 Cat#5852) and *HAND2* (Abcam Cat# ab200040) were used at 1: 1,000 and anti-Vinculin (Abcam Cat#  
563 ab129002, RRID:AB\_11144129) was used at 1: 10,000.

564

#### 565 **Proliferation assays**

566 To evaluate the proliferation rate of the *PHOX2B*<sup>-/-</sup> and *GATA3*<sup>-/-</sup> clones compared to the parental SH-  
567 SY5Y cell line, 10,000 cells were plated in a 24-well plate in 6 replicates. Cells were then counted at day  
568 3, 7 and 10, using a Vi-cell XR Viability Analyzer (Beckman Coulter).

569

#### 570 **Invasion and migration assays**

571 Invasion assays were performed in 96-well low adherent plates (Corning) with 2,000 cells per well for  
572 the SH-EP cell line (n=12), and 10,000 cells per well for the SH-SY5Y cell line (n=12) and *GATA3*<sup>-/-</sup> clones  
573 (n=18). After 4 days of culture, spheroids were embedded in Corning® Collagen I (cat# 354249, Corning)

574 and cultured in normal conditions. Invasive cells were observed 72 hours after spheroid inclusion and  
575 the area of migration was quantified using the ImageJ software (RRID:SCR\_003070).

576 Transwell experiments were performed using 12-well 8  $\mu$ m culture inserts (Dutscher). 50,000 cells  
577 were used per condition. After 24 hours of incubation, cells that have migrated through the insert  
578 membrane were fixed and stained with crystal violet (Sigma Aldrich). In each replicate, migrated cells  
579 were quantified using the mean of 6 different images, 6 replicates were performed per cell line.

580

### 581 **Immunofluorescence**

582 100,000 cells for SK-N-SH and IC-pPDXC-63 cell lines were plated in a 4-well Lab-Tek chamber (Cat#  
583 177399PK, Thermo Fisher) 48 hours before immunostaining. Cells were fixed with 4% PFA buffer,  
584 permeabilized with a 0.2% triton solution and blocked in a 1% BSA 0.1% triton solution and incubated  
585 with anti-PHOX2B (Santa Cruz Biotechnology Cat# sc-376997, RRID:AB\_2813765) and anti-CD44 (Cat#  
586 15675-1-AP, Proteintech) at 1:100. Secondary antibodies were Cy5-Anti-Mouse (Cat# 715-175-151,  
587 Jackson ImmunoResearch Labs / 1:100, RRID:AB\_2340820) and Cy3-Anti-Rabbit (Cat# 711-165-152,  
588 Jackson ImmunoResearch Labs / 1:100, RRID:AB\_2307443) and DAPI (Cat# 62248, Thermo Fisher) was  
589 diluted at 1: 1,000 in ProLong™ Gold (Cat# P36930, Thermo Fisher).

590

### 591 **Chemotherapy treatments**

592 SH-SY5Y, SH-EP or *GATA3*<sup>-/-</sup> clones were plated in a 24-well plate 24 hours before the chemotherapy  
593 treatments. Seeding densities for each cell lines were optimized to reach 80% confluence in the  
594 untreated cells. Cells were treated with 3 different doses of the conventional chemotherapy for 2 days  
595 and cell viability was assessed using a Vi-cell XR Viability Analyzer (Beckman Coulter); 6 replicates were  
596 performed for each cell line and each dose.

597 IC-pPDXC-63 and SK-N-SH cell lines were plated in 96-well plates 24 hours before the addition of  
598 doxorubicin or etoposide. Seeding densities for each cell line were optimized to reach 80% confluence  
599 in the untreated cells. Cells were treated with chemotherapeutic agents for 72 hours. Cell viability was  
600 then measured using the Resazurin reagent (Sigma-Aldrich).

601

### 602 **RNA-sequencing and analyses**

603 RNAs were extracted from frozen tumors by mechanical crushing followed by TRIzol® reagent  
604 (Cat#15596018, Invitrogen) and purified with the NucleoSpin RNA kit (Cat# 740955.50, Macherey-  
605 Nagel). For the bulk scRNA-seq samples and the cell lines, extraction and purification were done  
606 directly using this NucleoSpin RNA kit. RNA quality was assessed with a Bioanalyzer instrument and  
607 RNAs with an RNA Integrity Number above 7 were processed for sequencing as previously described<sup>12</sup>.  
608 RNA sequencing libraries were prepared from 500 ng to 1  $\mu$ g of total RNA using the Illumina TruSeq

609 Stranded mRNA Library preparation kit according to manufacturer recommendation. For the  
610 xenografts of IC-pPDXC-63 *in vivo* sample, mRNA Library preparation was done with TruSeq RNA Exome  
611 from Illumina. 100 bp paired-end sequencing was performed with the Illumina NovaSeq 6000  
612 instrument (pair-ended, 100 nt).

613 Reads were aligned to the human reference genome hg38/GRCh38 using STAR 2.6.1a\_08-27  
614 (RRID:SCR\_015899, <https://github.com/alexdobin/STAR>) with the following options: -  
615 outFilterMismatchNoverLmax 0.04 --alignIntronMin 20 - lignIntronMax 1000000 -  
616 outFilterMultimapNmax 20. Gene expression values (FPKM=fragments per kilobase per million reads)  
617 were computed by Cufflinks v2.2.146 (RRID:SCR\_014597, <http://cole-trapnell-lab.github.io/cufflinks/>)  
618 and further normalization between samples was done using quantile normalization (R/Bioconductor  
619 package LIMMA (RRID:SCR\_010943)).

620

### 621 **PHOX2B immunohistochemistry**

622 Tumors were fixed in a 4% formol buffer (VWR) during 24 hours, embedded in paraffin and cut in 4  $\mu$ m  
623 slices. For PHOX2B immunohistochemistry, the REAL™ EnVision™ Detection System (Cat# K406511-2,  
624 Agilent Technologies) was used and the antibody against PHOX2B (Cat# sc-376997, Santa Cruz) was  
625 diluted at 1:200. Xenograft slices were also colored with a hematoxylin solution.

626

### 627 **ChIP-seq and analyses**

628 H3K27ac chromatin immunoprecipitation (ChIP) experiments were performed as previously  
629 described<sup>12</sup> using the iDeal ChIP-seq kit for histones (Cat# C01010171, Diagenode) and the H3K27ac  
630 rabbit polyclonal antibody (Abcam Cat# ab4729, RRID:AB\_2118291). Illumina sequencing libraries  
631 were prepared from the ChIP and input DNA and sequenced on the Illumina NovaSeq 6000 instrument  
632 (single reads, 100 nt). ChIP-seq reads were mapped to the human reference genome hg19/GRCh37  
633 using Bowtie2 v2.1.0 (<http://bowtie-bio.sourceforge.net/bowtie2/index.shtml>) and further analyzed  
634 with HMCAn v1.40 (RRID:SCR\_010858)<sup>45</sup>. Super-enhancers were called with LILY software as previously  
635 described<sup>12</sup>. LILY was also used to normalize HMCAn density profiles between samples. The H3K27ac  
636 signal on super-enhancers shown in the heatmap was computed as the sum of normalized H3K27ac  
637 densities divided by the length of the super-enhancers. For TF genes associated with several super-  
638 enhancers, the signal of the associated super-enhancers is summed and divided by their total length.  
639 PCA was computed as described previously<sup>12</sup>.

640

### 641 **Flow cytometry and sorting**

642 Flow cytometry analysis was performed with the BD™ LSRII cytometer. Cells were detached with  
643 TrypLE™ Express Enzyme (Cat# 12604013, Gibco), suspended in PBS and permeabilized with the

644 IntraPrep kit (Cat# A07803, BeckmanCoulter). The cell suspension was incubated with PHOX2B [Clone  
645 B-11] - AlexaFluor® 647 (Cat# SC-376997 AF647, Santa Cruz) and CD44-FITC (Cat# 103005, Biolegend,  
646 RRID:AB\_312956) antibodies during 40 min at 4°C.

647 Flow cytometry sorting was performed with the S3e™ cell sorter (Bio Rad). Cells were detached with  
648 TrypLE™ Express Enzyme (Cat# 12604013, Gibco), suspended in PBS and incubated with CD44-FITC  
649 antibody 30 min at 4°C in dark. Cells positive and negative for CD44 staining were sorted.

650 The first gating based on FSC/SSC represents 60% for IC-pPDXC-63 and 75% for SK-N-SH. Doublet cells  
651 are eliminated by gating on SSC-W / SSC-H followed by FSC-W / FSC- H. The second gating based on  
652 DAPI negative staining eliminates dead cells. The boundaries between positive staining and negative  
653 staining are always more than 1 Log of fluorescence intensity. A control tube without staining is always  
654 analyzed to determine auto-fluorescence.

655

#### 656 **Tumor dissociation into single-cell suspension**

657 PDX tumors were cut with scalpels in small fragments. Enzymatic dissociation was realized in CO<sub>2</sub>  
658 independent medium (GIBCO) containing 150 µg/mL Liberase™ TL Research Grade (Cat# 5401020001,  
659 Merk) and 150 µg/mL DNase (DN25, Sigma Aldrich), for 30 min at 37°C with 400 rpm agitation. Cell  
660 suspension was then filtered using 70 µm cell strainer (Cat# 130-098-462, Miltenyi Biotec). The cell  
661 suspension was washed twice with PBS. Viability was measured using Vi-cell XR Viability Analyzer  
662 (Beckman Coulter). For some PDXs, the Mouse Cell Depletion KIT was used following the  
663 manufacturer's instructions (Cat# 130-104-694, Miltenyi Biotec).

664

665

#### 666 **Single-cell RNA-sequencing experiments and preprocessing of data**

667 Single-cell RNA-seq was performed with the 10x Genomics Chromium Single Cell 3' Kit (v3) according  
668 to the standard protocol. Libraries were sequenced on an Illumina HiSeq2500 or NovaSeq 6000  
669 sequencing platform.

670 CellRanger version 3.1.0 (10x Genomics, <https://support.10xgenomics.com/>) was used to demultiplex,  
671 align and generate UMI count tables from sequencing reads. Two reference genomes were used to  
672 align reads:

- 673 • The human reference genome (hg38/GRCh38) for *in vitro* cell lines.
- 674 • A human-mouse reference genome (GRCh38-mm10) for the 14 neuroblastoma PDX models. In this  
675 scenario, we identified the mouse and human cells after inspection of the percentage of coverage from  
676 GRCh38 genome. We labeled cells as either human (at least 80%), murine (less than 30%) or human-  
677 murine doublets (between 30-80%). Only human and human-murine doublet cells were selected and  
678 coverage plus gene information of only GRCh38 genome were retained for downstream analysis.

679 Summary of analyses are shown in **Table S3**. Of note, we performed two technical replicates for three  
680 models: HSJD-NB-005, IC-pPDX-63 and IC-pPDX-75 (\* in Table S3) to assess reproducibility at distinct  
681 passages in mice (data not shown).

682

### 683 **Doublet detection**

684 Scrublet<sup>46</sup> v0.2.1 was used to detect potential doublets using default parameters  
685 (expected\_doublet\_rate=0.06). Cells marked as doublets were removed from subsequent analysis  
686 (results in **Table S3**). Doublet detection was only feasible on samples aligned to GRCh38 genome.

687

### 688 **Quality control of single-cell data**

689 First, all ribosomal genes (defined as *RPL/RPS* genes) were removed from the raw expression matrices.  
690 Then, coverage thresholds were set for each sample individually; an upper threshold was set to remove  
691 outlier cells with coverage greater than the 99th percentile, and a lower threshold was set to remove  
692 low quality cells with coverage inferior to the 1st percentile, except for the IC-pPDX-63 cell line for  
693 which the limits were 1000 UMI and 500 genes detected per cell. To avoid cells with low number of  
694 genes, the same lower threshold was applied on the number of genes thus defining a minimum  
695 number of genes required. Finally, cells with more than 20% of reads mapping mitochondrial genes  
696 were removed.

697

### 698 **Normalization of single-cell data**

699 Raw UMI counts were normalized using the “SCTransform” function of Seurat<sup>47,48</sup> v3.1.5  
700 (RRID:SCR\_007322). Regressed variables included cell coverage, number of features, and the  
701 percentage of UMI from mitochondrial genes.

702

### 703 **Dimensionality reduction and cluster identification**

704 Normalized count data was subjected to dimensionality reduction keeping the first 30 principal  
705 components. Uniform Manifold Approximation and Projections (umap) embeddings were calculated  
706 using these PCs as input and cells were clustered using the “FindClusters” function of Seurat.

707

### 708 **Cell type annotation**

709 Marker genes that define cell clusters were identified after differential expression analysis using  
710 Seurat’s “FindAllMarkers” function. Clusters were annotated by comparing their top marker genes to  
711 canonical cell type markers from the literature.

712

### 713 **Generation of single-cell signature scores**

714 To plot the expression of gene signatures in single cells, we used the “AddModuleScore” function from  
715 Seurat R package with 100 genes in the control gene set. Expression scale was binned into 10 bins  
716 when a gene signature is plotted and into 3 bins (1= low, 2= median, 3= high) when a single gene is  
717 plotted.

718

#### 719 **scRNA-seq data integrations**

720 Harmony<sup>24</sup> (<https://github.com/immunogenomics/harmony>) was used to integrated the 14 PDX  
721 models. Downstream analysis was carried out as described in “Dimensionality reduction and cluster  
722 identification”. Of note, when several single-cell transcriptomes are available for the same model, only  
723 one was used for the integration to avoid over-representation.

724

#### 725 **Cell cycle analysis**

726 We scored single cells based on expression of G2/M and S phase markers using Seurat’s  
727 “CellCycleScoring” function.

728

#### 729 **Copy number analysis in single cells**

730 Copy number variations at the single cell level were called with R package InferCNV v1.2.1<sup>22</sup>  
731 (<https://github.com/broadinstitute/inferCNV>) using default parameters. Normal cells from the  
732 microenvironment were used as reference cells. Cells with fewer than 1000 UMI were excluded and  
733 monocytes from publicly available single cell RNA sequencing of healthy human PBMCs<sup>49,50</sup> (GEO:  
734 GSE115189) were used as reference cells (n=376).

735

736

#### 737 **QUANTIFICATION AND STATISTICAL ANALYSES**

738 Statistical tests were performed using GraphPad Prism 8 (RRID:SCR\_002798). Significance values are  
739 described in the figure legends. P-values were determined via two-tailed unpaired Welch’s t-test  
740 (\*\*:p<0.01; \*\*\*:p<0.001).

741

742 **SUPPLEMENTAL INFORMATION**

743

744 **Figure S1:** Knock-out of *PHOX2A*, *PHOX2B* and *GATA3* genes by CRISPR-Cas9.

745 **Figure S2:** Sorted mesenchymal cells from the IC-pPDXC-63, SK-N-SH and *GATA3*<sup>-/-</sup> cell lines, adopt a  
746 noradrenergic identity when engrafted in the mouse.

747 **Figure S3:** Detailed analyses of single-cell RNAseq of the 14 PDX models.

748

749

750 **Table S1:** Expression levels of noradrenergic markers, TFs of the noradrenergic and mesenchymal CRCs  
751 in cell lines and xenografts.

752 **Table S2:** Characteristics of the 14 neuroblastoma PDX models studied by scRNA-seq.

753 **Table S3:** Filtering of human cells with high quality data for the 14 neuroblastoma PDX models.

754 **Table S4:** Lists of genes that are up-regulated in the different clusters of noradrenergic cells in a series  
755 of 14 neuroblastoma PDX models.



Figure S1

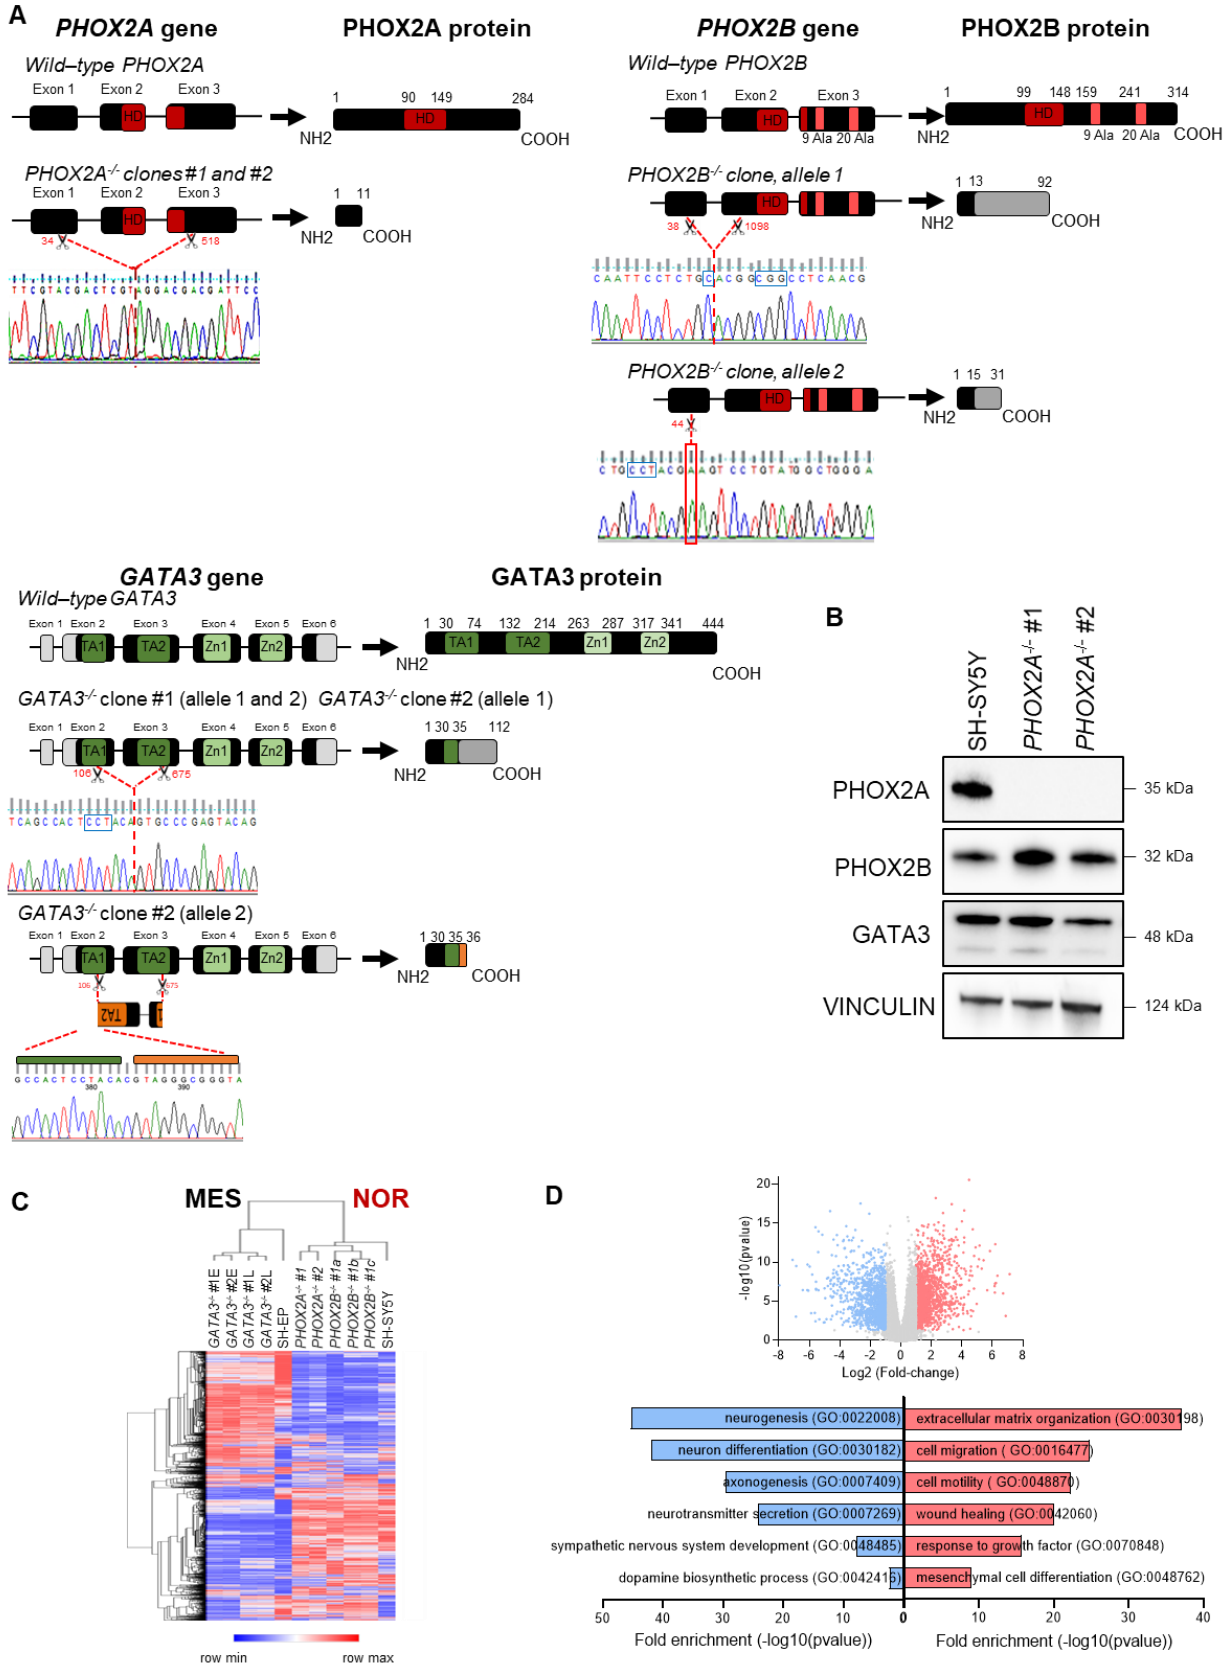

756

757

758

759

**Figure S1: Knock-out of *PHOX2A*, *PHOX2B* and *GATA3* genes by CRISPR-Cas9.** (A) Two guide RNAs were chosen per gene to induce large deletions (see Methods). The PAM motifs are surrounded in blue when still presents in the modified sequence. Both *PHOX2A<sup>-/-</sup>* clones are homozygous and present with

760 a large deletion between the 1<sup>st</sup> and 3<sup>rd</sup> exons, following Cas9-induced breaks at the expected  
761 positions. This results in a frameshift and subsequently in a truncated protein that has lost all its  
762 functional domains, containing only the 11 first amino acids of the normal PHOX2A protein. The  
763 *PHOX2B*<sup>-/-</sup> clone is heterozygous. In the first allele, the Cas9 induced one break in exon 1 in the PAM  
764 motif instead of 3 bp upstream and one break in exon 2, 4 bp upstream of the PAM (instead of 3 bp  
765 upstream). This results in a frameshift and subsequently in a truncated protein, in which only the first  
766 13 amino acids of the normal PHOX2B protein are conserved. In the second allele, the Cas9 induced  
767 only one cleave in the first exon, 3 bp upstream of the PAM, as expected and an “A” insertion was  
768 observed. This results in a frameshift and subsequently in a truncated protein, in which only the first  
769 15 amino acids of the normal PHOX2B protein are conserved. *GATA3*<sup>-/-</sup> clone #1 is homozygous and  
770 presents with a large deletion between the 2<sup>nd</sup> and 3<sup>rd</sup> exons, following Cas9-induced breaks that  
771 occurred at the expected positions. This leads to a truncated protein of 112 amino acids that has lost  
772 all its functional domains and contains only the 35 first amino acids of the normal GATA3 protein.  
773 *GATA3*<sup>-/-</sup> clone #2 is heterozygous. One allele is similar to those of *GATA3*<sup>-/-</sup> clone #1. For the second  
774 allele, the break occurred at the expected position but the *GATA3* sequence between these two  
775 cleavage sites was reintegrated in the reverse direction, with one “C” insertion. This results in the  
776 translation of an aberrant protein of 36 amino acids, which contains only the first 35 amino acids of  
777 the normal GATA3 protein (HD: homeodomain, Ala: poly-alanines track, TA: transactivation domain,  
778 Zn: zinc finger domain) **(B)** Western blot analysis of PHOX2A, PHOX2B and GATA3 TFs in the 2 *PHOX2A*<sup>-/-</sup>  
779 clones and in the SH-SY5Y cell line, Vinculin was used as a loading control. **(C)** Unsupervised clustering  
780 analysis using the top 10% of genes with the highest IQR (inter-quantile range) shows that *PHOX2A*<sup>-/-</sup>  
781 and *PHOX2B*<sup>-/-</sup> clones resemble the parental noradrenergic SH-SY5Y cell line whereas *GATA3*<sup>-/-</sup> clones  
782 are clustered in the same branch as the SH-EP mesenchymal cell line. **(D)** Volcano plot of a differential  
783 analysis comparing the 4 *GATA3*<sup>-/-</sup> samples with 5 noradrenergic neuroblastoma cell lines without  
784 *MYCN* amplification (CLB-GA, NB-EBc1, SH-SY5Y, SJNB-1 and SK-N-FI). We used a raw p-value <0.05 and  
785 a fold-change >2. Gene Ontology analysis using ToppGene  
786 (<https://toppgene.cchmc.org/enrichment.jsp>) performed on the lists of differentially expressed genes  
787 in the *GATA3*<sup>-/-</sup> samples compared to the other neuroblastoma cell lines.  
788

Figure S2

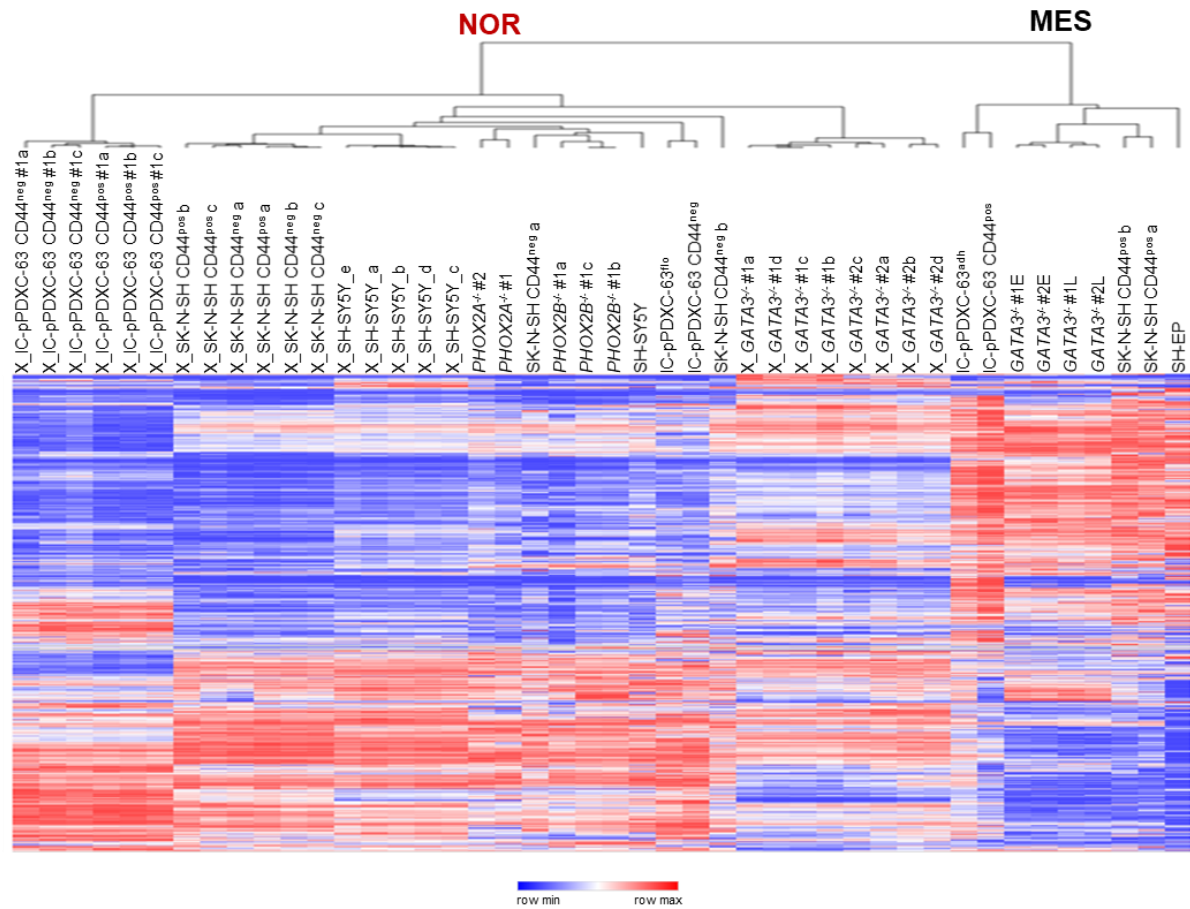

789

790 **Figure S2: Sorted mesenchymal cells from the IC-pPDXC-63, SK-N-SH and *GATA3*<sup>-/-</sup> cell lines, adopt a**  
791 **noradrenergic identity when engrafted in the mouse. Unsupervised hierarchical clustering based on**  
792 **a transcriptomic signature<sup>13</sup> discriminating noradrenergic and mesenchymal cells shows that all the *in***  
793 ***vitro* mesenchymal cell populations engrafted in mice give tumors with a noradrenergic transcriptomic**  
794 **profile.**

795

796

**Figure S3**

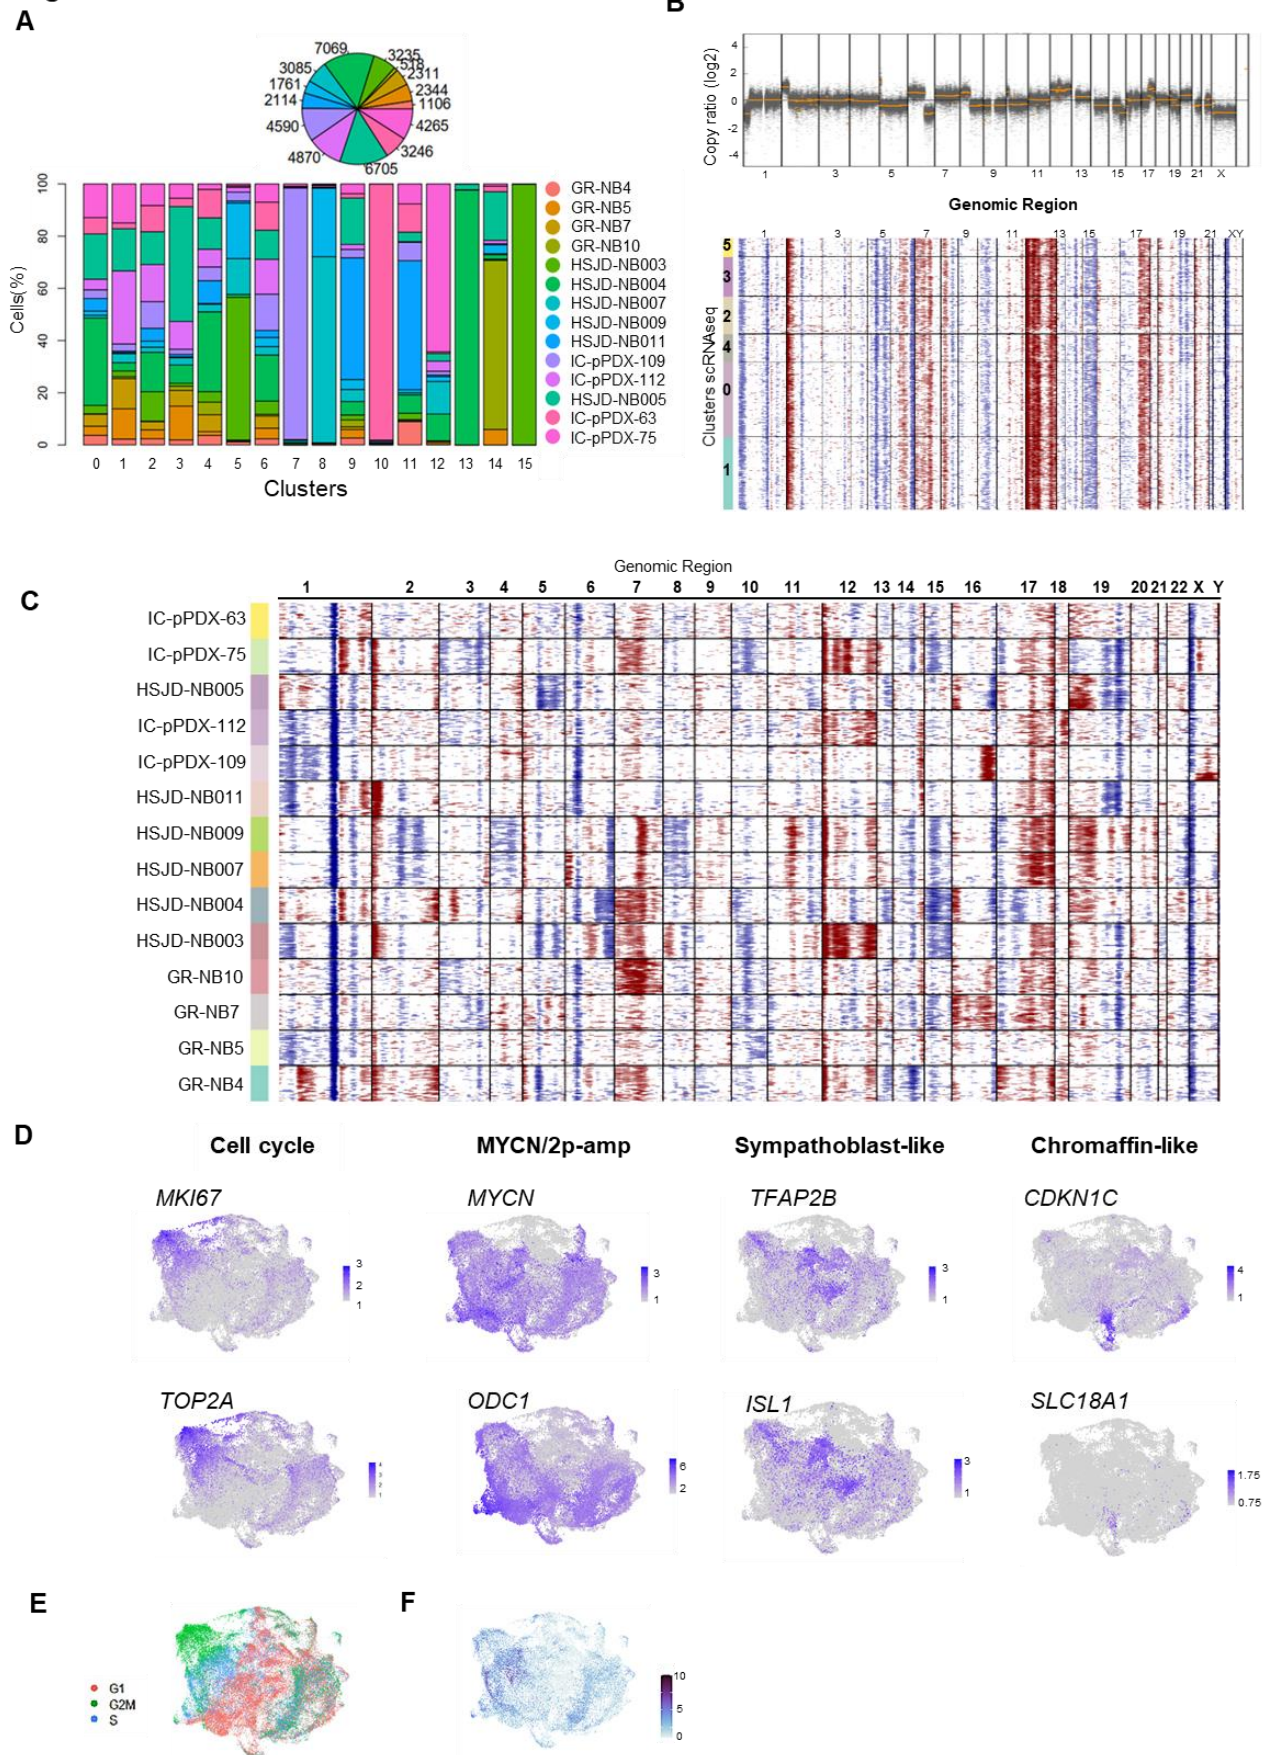

797  
798

Figure S3

G

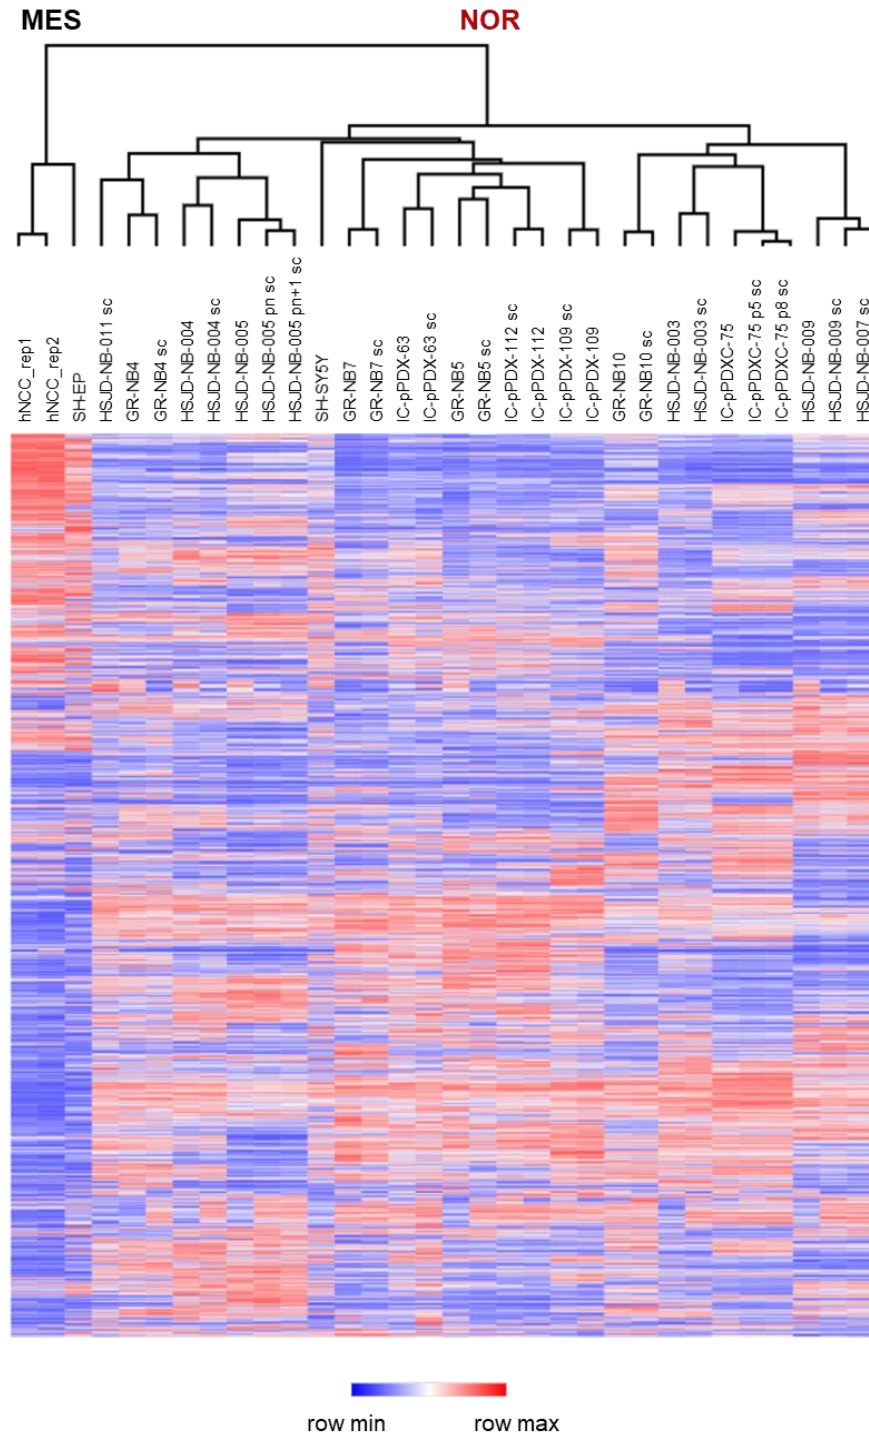

799

800

**Figure S3: Detailed analyses of single-cell RNAseq of the 14 PDX models.**

801

(A) The histogram highlights the contribution of the different samples to each cluster in percentage.

802

The pie chart depicts the contribution of each sample to the total number of cells (n= 47,219). (B) (Top)

803

Copy number profile inferred from WES from HSJD-NB-003 PDX model. (Bottom) InferCNV profile

804

obtained from scRNAseq data of HSJD-NB-003. (C) Overview of the genomic alterations present in each

805 PDX model with the InferCNV profiles on the 14 PDX models, using 500 randomly-selected cells from  
806 each sample. **(D)** Individual expression of some genes representing the mains categories identified in  
807 the noradrenergic tumor cells: cell cycle, MYCN/2p-amp, sympathoblast-like and chromaffin-like. **(E)**  
808 The tumor cells are colored according to their corresponding cell cycle phase (red: G1 phase; green:  
809 G2/M phase; blue: S phase). **(F)** Plot of the signature of MYCN target genes<sup>51</sup> in the integration of all  
810 PDX samples. **(G)** Unsupervised hierarchical clustering using the top 10% of genes with the highest IQR  
811 (inter-quantile range) for all single cell RNAseq from PDX samples, the mesenchymal (SH-EP and  
812 hNCCs) and noradrenergic (SH-SY5Y) cell lines. This shows that all PDX models clustered in the  
813 noradrenergic (NOR) branch.

814 **REFERENCES**

- 815 1. Matthay, K. K. *et al.* Neuroblastoma. *Nat Rev Dis Primers* **2**, 16078 (2016).
- 816 2. Huber, K. The sympathoadrenal cell lineage: specification, diversification, and new  
817 perspectives. *Dev. Biol.* **298**, 335–343 (2006).
- 818 3. Marshall, G. M. *et al.* The prenatal origins of cancer. *Nat. Rev. Cancer* **14**, 277–289  
819 (2014).
- 820 4. Brodeur, G. M., Seeger, R. C., Schwab, M., Varmus, H. E. & Bishop, J. M. Amplification  
821 of N-myc in untreated human neuroblastomas correlates with advanced disease stage.  
822 *Science* **224**, 1121–4 (1984).
- 823 5. Chen, Y. *et al.* Oncogenic mutations of ALK kinase in neuroblastoma. *Nature* **455**, 971–4  
824 (2008).
- 825 6. George, R. E. *et al.* Activating mutations in ALK provide a therapeutic target in  
826 neuroblastoma. *Nature* **455**, 975–8 (2008).
- 827 7. Janoueix-Lerosey, I. *et al.* Somatic and germline activating mutations of the ALK kinase  
828 receptor in neuroblastoma. *Nature* **455**, 967–70 (2008).
- 829 8. Mosse, Y. P. *et al.* Identification of ALK as a major familial neuroblastoma  
830 predisposition gene. *Nature* **455**, 930–5 (2008).
- 831 9. Ackermann, S. *et al.* A mechanistic classification of clinical phenotypes in  
832 neuroblastoma. *Science* **362**, 1165–1170 (2018).
- 833 10. Peifer, M. *et al.* Telomerase activation by genomic rearrangements in high-risk  
834 neuroblastoma. *Nature* **526**, 700–704 (2015).
- 835 11. Valentijn, L. J. *et al.* TERT rearrangements are frequent in neuroblastoma and identify  
836 aggressive tumors. *Nat. Genet.* **47**, 1411–1414 (2015).
- 837 12. Boeva, V. *et al.* Heterogeneity of neuroblastoma cell identity defined by transcriptional  
838 circuitries. *Nat. Genet.* **49**, 1408–1413 (2017).

- 839 13. van Groningen, T. *et al.* Neuroblastoma is composed of two super-enhancer-associated  
840 differentiation states. *Nat. Genet.* **49**, 1261–1266 (2017).
- 841 14. Decaestecker, B. *et al.* TBX2 is a neuroblastoma core regulatory circuitry component  
842 enhancing MYCN/FOXM1 reactivation of DREAM targets. *Nat Commun* **9**, 4866 (2018).
- 843 15. Durbin, A. D. *et al.* Selective gene dependencies in MYCN-amplified neuroblastoma  
844 include the core transcriptional regulatory circuitry. *Nat. Genet.* **50**, 1240–1246 (2018).
- 845 16. Wang, L. *et al.* ASCL1 is a MYCN- and LMO1-dependent member of the adrenergic  
846 neuroblastoma core regulatory circuitry. *Nat Commun* **10**, 5622 (2019).
- 847 17. Rajbhandari, P. *et al.* Cross-Cohort Analysis Identifies a TEAD4-MYCN Positive  
848 Feedback Loop as the Core Regulatory Element of High-Risk Neuroblastoma. *Cancer*  
849 *Discov* **8**, 582–599 (2018).
- 850 18. Ross, R. A., Spengler, B. A. & Biedler, J. L. Coordinate morphological and biochemical  
851 interconversion of human neuroblastoma cells. *J. Natl. Cancer Inst.* **71**, 741–747 (1983).
- 852 19. Fernando, J. *et al.* A mesenchymal-like phenotype and expression of CD44 predict lack of  
853 apoptotic response to sorafenib in liver tumor cells. *International Journal of Cancer* **136**,  
854 E161–E172 (2015).
- 855 20. Ramos, T. L. *et al.* MSC surface markers (CD44, CD73, and CD90) can identify human  
856 MSC-derived extracellular vesicles by conventional flow cytometry. *Cell Commun.*  
857 *Signal* **14**, 2 (2016).
- 858 21. Saito, S. *et al.* CD44v6 expression is related to mesenchymal phenotype and poor  
859 prognosis in patients with colorectal cancer. *Oncology Reports* **29**, 1570–1578 (2013).
- 860 22. Tickle T, Tirosh I, Georgescu C, Brown M, & Haas B. inferCNV of the Trinity CTAT  
861 Project. (2019).



- 862 23. Cohen, N., Betts, D. R., Rechavi, G., Amariglio, N. & Trakhtenbrot, L. Clonal expansion  
863 and not cell interconversion is the basis for the neuroblast and nonneuronal types of the  
864 SK-N-SH neuroblastoma cell line. *Cancer Genet. Cytogenet.* **143**, 80–84 (2003).
- 865 24. Korsunsky, I. *et al.* Fast, sensitive and accurate integration of single-cell data with  
866 Harmony. *Nat. Methods* **16**, 1289–1296 (2019).
- 867 25. Chan, W. H. *et al.* RNA-seq of Isolated Chromaffin Cells Highlights the Role of Sex-  
868 Linked and Imprinted Genes in Adrenal Medulla Development. *Sci Rep* **9**, 3929 (2019).
- 869 26. Furlan, A. *et al.* Multipotent peripheral glial cells generate neuroendocrine cells of the  
870 adrenal medulla. *Science* **357**, (2017).
- 871 27. Van Limpt, V. A. E. *et al.* High delta-like 1 expression in a subset of neuroblastoma cell  
872 lines corresponds to a differentiated chromaffin cell type. *Int J Cancer* **105**, 61–69 (2003).
- 873 28. De Preter, K. *et al.* Human fetal neuroblast and neuroblastoma transcriptome analysis  
874 confirms neuroblast origin and highlights neuroblastoma candidate genes. *Genome Biol.*  
875 **7**, R84 (2006).
- 876 29. Goridis, C. & Rohrer, H. Specification of catecholaminergic and serotonergic neurons.  
877 *Nature Reviews Neuroscience* **3**, 531–541 (2002).
- 878 30. Pattyn, A., Morin, X., Cremer, H., Goridis, C. & Brunet, J. F. The homeobox gene  
879 Phox2b is essential for the development of autonomic neural crest derivatives. *Nature*  
880 **399**, 366–70 (1999).
- 881 31. Rohrer, H. Transcriptional control of differentiation and neurogenesis in autonomic  
882 ganglia. *Eur J Neurosci* **34**, 1563–73 (2011).
- 883 32. van Groningen, T. *et al.* A NOTCH feed-forward loop drives reprogramming from  
884 adrenergic to mesenchymal state in neuroblastoma. *Nat Commun* **10**, 1530 (2019).

- 885 33. Dong, R. *et al.* Single-Cell Characterization of Malignant Phenotypes and Developmental  
886 Trajectories of Adrenal Neuroblastoma. *Cancer Cell* (2020)  
887 doi:10.1016/j.ccell.2020.08.014.
- 888 34. Asgharzadeh, S. *et al.* Clinical significance of tumor-associated inflammatory cells in  
889 metastatic neuroblastoma. *J. Clin. Oncol.* **30**, 3525–3532 (2012).
- 890 35. Piskareva, O. *et al.* The development of cisplatin resistance in neuroblastoma is  
891 accompanied by epithelial to mesenchymal transition in vitro. *Cancer Lett.* **364**, 142–155  
892 (2015).
- 893 36. Debruyne, D. N. *et al.* ALK inhibitor resistance in ALK(F1174L)-driven neuroblastoma  
894 is associated with AXL activation and induction of EMT. *Oncogene* **35**, 3681–3691  
895 (2016).
- 896 37. Lumb, R. & Schwarz, Q. Sympathoadrenal neural crest cells: the known, unknown and  
897 forgotten? *Dev. Growth Differ.* **57**, 146–157 (2015).
- 898 38. Olsen, R. R. *et al.* MYCN induces neuroblastoma in primary neural crest cells. *Oncogene*  
899 **36**, 5075–5082 (2017).
- 900 39. Tsubota, S. & Kadomatsu, K. Origin and initiation mechanisms of neuroblastoma. *Cell*  
901 *Tissue Res.* **372**, 211–221 (2018).
- 902 40. Dun, S. L., Brailoiu, G. C., Yang, J., Chang, J. K. & Dun, N. J. Cocaine- and  
903 amphetamine-regulated transcript peptide and sympatho-adrenal axis. *Peptides* **27**, 1949–  
904 1955 (2006).
- 905 41. El Faitwri, T. & Huber, K. Expression pattern of delta-like 1 homolog in developing  
906 sympathetic neurons and chromaffin cells. *Gene Expr Patterns* **30**, 49–54 (2018).
- 907 42. Schütz, B., Schäfer, M. K., Eiden, L. E. & Weihe, E. Vesicular amine transporter  
908 expression and isoform selection in developing brain, peripheral nervous system and gut.  
909 *Brain Res Dev Brain Res* **106**, 181–204 (1998).

- 910 43. Weihe, E., Schäfer, M. K., Erickson, J. D. & Eiden, L. E. Localization of vesicular  
911 monoamine transporter isoforms (VMAT1 and VMAT2) to endocrine cells and neurons  
912 in rat. *J Mol Neurosci* **5**, 149–164 (1994).
- 913 44. Wildner, H., Gierl, M. S., Strehle, M., Pla, P. & Birchmeier, C. Insm1 (IA-1) is a crucial  
914 component of the transcriptional network that controls differentiation of the sympatho-  
915 adrenal lineage. *Development* **135**, 473–481 (2008).
- 916 45. Ashoor, H. *et al.* HMCAn: a method for detecting chromatin modifications in cancer  
917 samples using ChIP-seq data. *Bioinformatics* **29**, 2979–2986 (2013).
- 918 46. Wolock, S. L., Lopez, R. & Klein, A. M. Scrublet: Computational Identification of Cell  
919 Doublets in Single-Cell Transcriptomic Data. *Cell Syst* **8**, 281-291.e9 (2019).
- 920 47. Butler, A., Hoffman, P., Smibert, P., Papalexi, E. & Satija, R. Integrating single-cell  
921 transcriptomic data across different conditions, technologies, and species. *Nature*  
922 *Biotechnology* **36**, 411–420 (2018).
- 923 48. Stuart, T. *et al.* Comprehensive Integration of Single-Cell Data. *Cell* **177**, 1888-1902.e21  
924 (2019).
- 925 49. Franzén, O., Gan, L.-M. & Björkegren, J. L. M. PanglaoDB: a web server for exploration  
926 of mouse and human single-cell RNA sequencing data. *Database (Oxford)* **2019**, (2019).
- 927 50. Freytag, S., Tian, L., Lönnstedt, I., Ng, M. & Bahlo, M. Comparison of clustering tools in  
928 R for medium-sized 10x Genomics single-cell RNA-sequencing data. *F1000Res* **7**, 1297  
929 (2018).
- 930 51. Valentijn, L. J. *et al.* Functional MYCN signature predicts outcome of neuroblastoma  
931 irrespective of MYCN amplification. *Proc. Natl. Acad. Sci. U.S.A.* **109**, 19190–19195  
932 (2012).
- 933
